# Supplementary material for: The Secreted Protease PrtA Controls Cell Growth, Biofilm Formation and Pathogenicity in Xylella fastidiosa
Source: PubMed Central journal article supplement (PMC4974619; doi:10.1038/srep31098), 2016-08-05
Supplement: srep31098-s1.pdf [file srep31098-s1.pdf]

**Supplementary Information for Gouran *et. al.* "A Secreted Protease PrtA Controls Cell Growth, Biofilm Formation and Pathogenicity in *Xylella fastidiosa*"**

Contents:

Figure S1. Genomic region of PD0956.

Figure S2. Disruption of PD0956 by insertion of a gentamicin resistance cassette and binary vector for the expression of PrtA in tobacco.

Figure S3. Western blot with anti-PrtA.

Table S1. Differentially expressed genes in the *prtA* mutant.

Table S2. Differentially expressed secreted proteins in the *prtA* mutant.

Table S3. Enrichment analysis of gene ontology terms from differentially expressed transcripts in the *prtA* mutant.

Complete Methods.

# *Xylella fastidiosa* Temecula1 main chromosome (2,519,802 bp)

scale: — 1000 bp

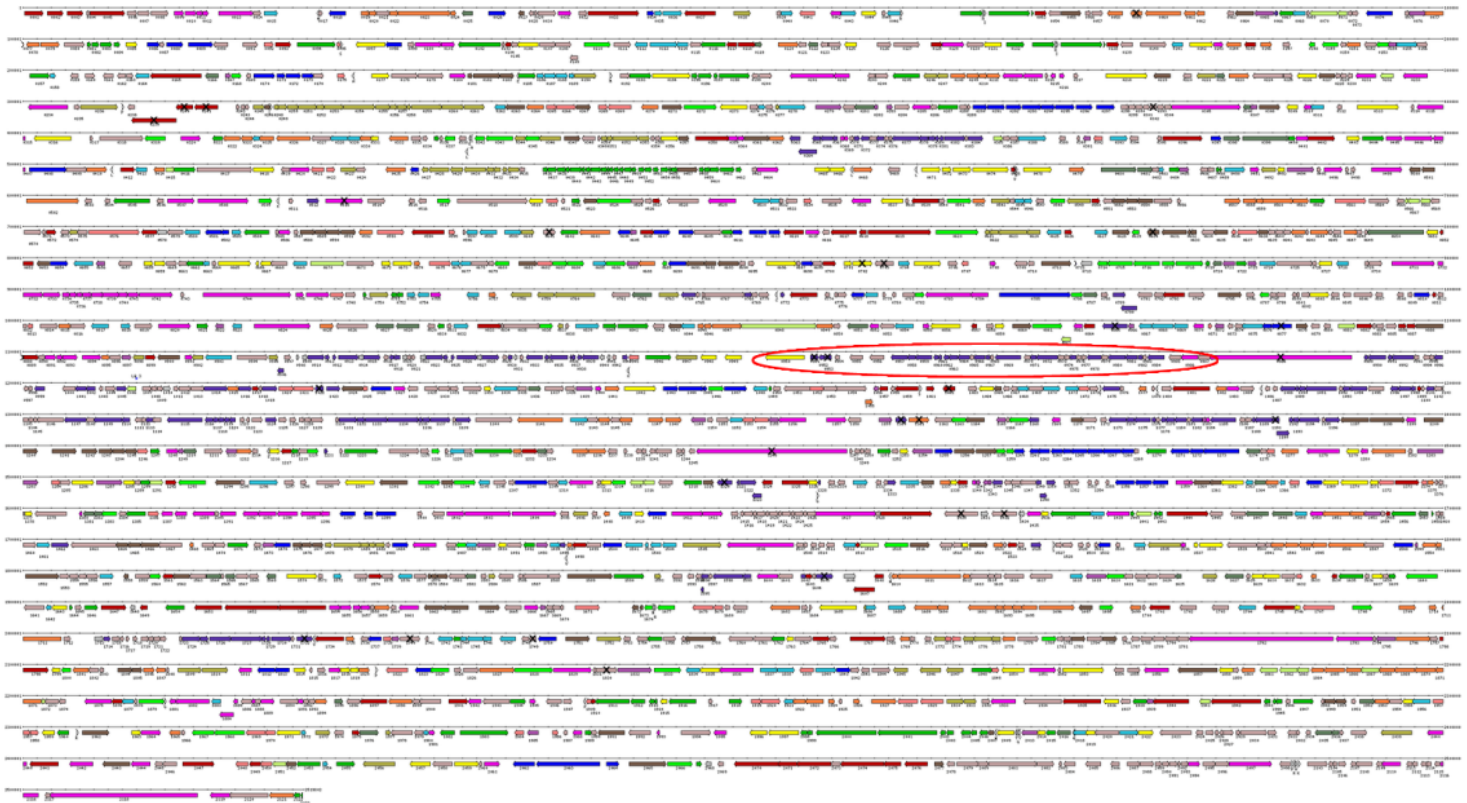

## PD0956 genomic region

(shown from PD0950 to PD0987, coordinates 1,152,326 to 1,183,606)

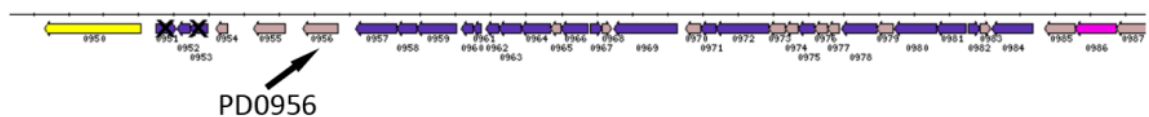

**Figure S1. Genomic region of PD0956.** Linear representation of the genome of *Xylella fastidiosa* Temecula1 strain, with protein, rRNA and tRNA coding sequences indicated by arrows according to their coding strand. Modified from <http://bioinfo03.ibi.unicamp.br/lbi>. The region circled in red corresponding to genomic region spanning CDS PD0950 to PD0987 is shown in greater detail below, in which PD0956 is pointed. Downstream CDS PD0955 and PD0954 belong to separate transcriptional units according to the Prokaryotic Operon DB (<http://operons.ibt.unam.mx/OperonPredictor/>) and DOOR 2.0 server

(<http://csbl.bmb.uga.edu/DOOR>). Colors of arrows representing coding sequences are according to their functional COG groups as predicted during original genome annotation of strain Temecula1. In the detail yellow indicate macromolecule metabolism, blue indicates mobile genetic elements-related sequences, light brown indicate conserved hypothetical proteins and magenta indicate pathogenicity, virulence, and adaptation.

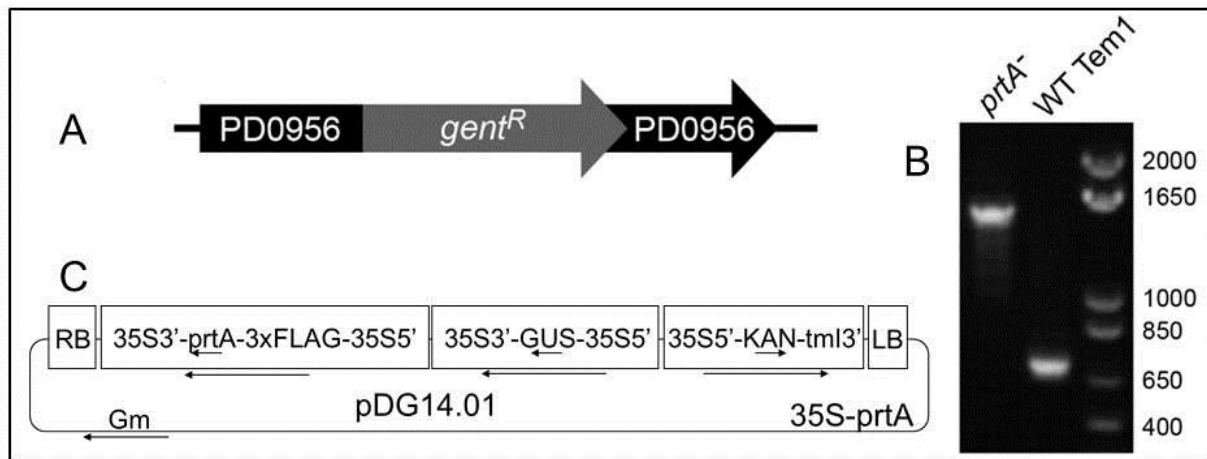

**Figure S2. Disruption of PD0956 by insertion of a gentamicin resistance cassette.**

(A) To disrupt PrtA (PD0956), a mutagenesis cassette was synthesized (GenScript, NJ) by inserting a gentamicin resistance gene within PrtA's aspartic acid residue at the coding region amino acid position 194, a predicted residue for the catalytic triad. The flanking homology region of this cassette was comprised of the entire open reading frame of PD0956 (581bp at 5' and 424bp at 3'). The synthesized pUC57-PD0956::Gm was electroporated into *X. fastidiosa* wild type Temecula1 as described previously<sup>1</sup>. (B) Transformant double crossover events were confirmed via gel electrophoresis and

sequencing using two primers, Fwd: GGCAGCCATGTGTTATCTGA and Rev:

TCCCCAGGAACAGTACAAC, designed to anneal to 5' and 3' regions of the PD0956. (C)

**Binary vector for the expression of PrtA in tobacco.** Using epicenter Infusion

Recombination cloning (Madison, WI), the PrtA sequence was cloned into our binary vector pDU92.3103 such that the coding region was downstream of the cauliflower mosaic virus (CaMV) promoter and upstream of the CaMV terminator. This resulted in binary vector pDG14.01.

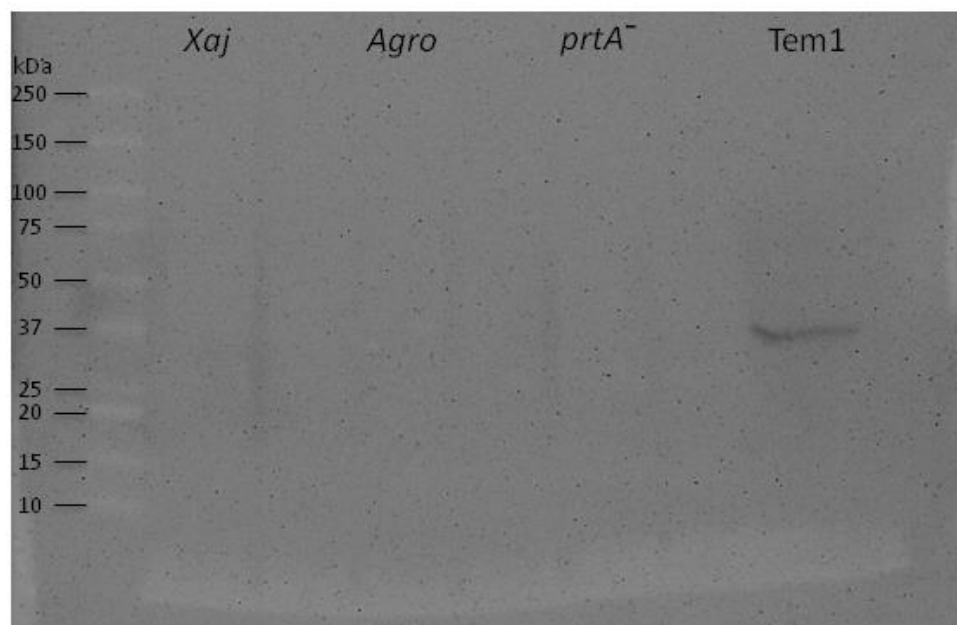

**Figure S3. Western blot with anti-PrtA.** Whole blot from which excerpt shown in Figure 2a was taken is shown, also containing protein extract from *Xanthomonas arboricola* pv. *juglandis* (*Xaj*) and *Agrobacterium tumefaciens* (*Agro*) besides the *X. fastidiosa* *prtA* mutant and wilt type Temecula1. See complete methods ahead.

**Table S1.** Differentially expressed genes in the *prtA* mutant.

| Gene ID | GeneName    | Description                      | log10 FC<br>( <i>prtA</i> /WT) | P-Value |
|---------|-------------|----------------------------------|--------------------------------|---------|
| PD1526  | -           | tRNA-Ser                         | 5.99                           | 0.000   |
| PD0050  | -           | tRNA-Ile                         | 5.835                          | 0.000   |
| PD0135  | -           | tRNA-Ile                         | 5.813                          | 0.000   |
| PD0096  | -           | tRNA-Ser                         | 5.41                           | 0.000   |
| PD1609  | -           | tRNA-Asn                         | 5.372                          | 0.000   |
| PD0411  | -           | tRNA-Leu                         | 5.088                          | 0.000   |
| PD0340  | -           | tRNA-Glu                         | 4.913                          | 0.000   |
| PD0191  | -           | tRNA-Met                         | 4.88                           | 0.000   |
| PD0341  | -           | tRNA-Ala                         | 4.815                          | 0.000   |
| PD0907  | -           | Uncharacterized protein          | 4.679                          | 0.000   |
| PD0184  | -           | tRNA-Glu                         | 4.669                          | 0.000   |
| PD0477  | -           | tRNA-Asp                         | 4.378                          | 0.000   |
| PD1880  | -           | tRNA-Gly                         | 4.307                          | 0.000   |
| PD1085  | -           | Uncharacterized protein          | 4.154                          | 0.000   |
| Gent    | -           | Gentamicin resistance gene       | 4.142                          | 0.000   |
| PD1496  | -           | tRNA-Val                         | 4.073                          | 0.000   |
| PD2017  | -           | tRNA-Gln                         | 4.056                          | 0.000   |
| PD1060  | -           | Uncharacterized protein          | 4.026                          | 0.000   |
| PD0247  | -           | tRNA-Leu                         | 3.868                          | 0.000   |
| PD1821  | -           | tRNA-Pro                         | 3.844                          | 0.000   |
| PD2101  | -           | tRNA-His                         | 3.767                          | 0.000   |
| PD0925  | -           | Phage-related protein            | 3.75                           | 0.000   |
| PD0237  | -           | tRNA-Phe                         | 3.734                          | 0.000   |
| PD1733  | -           | tRNA-Val                         | 3.66                           | 0.000   |
| PD0049  | -           | tRNA-Ala                         | 3.593                          | 0.000   |
| PD1675  | -           | tRNA-Met                         | 3.483                          | 0.000   |
| PD1176  | -           | Phage-related protein            | 3.44                           | 0.000   |
| PD1350  | <i>trbN</i> | Conjugal transfer protein        | 3.39                           | 0.000   |
| PD1961  | -           | tRNA-Arg                         | 3.364                          | 0.000   |
| PD0134  | -           | tRNA-Ala                         | 3.347                          | 0.000   |
| Kan_R   | -           | Kanamycin resistance gene        | 3.275                          | 0.000   |
| PD2102  | -           | tRNA-Lys                         | 3.104                          | 0.000   |
| PD0176  | -           | tRNA-Ala                         | 2.901                          | 0.000   |
| PD1189  | -           | Uncharacterized protein          | 2.892                          | 0.000   |
| PD0789  | -           | Resolvase/integrase-like protein | 2.888                          | 0.000   |
| PD0942  | -           | Uncharacterized protein          | 2.826                          | 0.000   |
| PD1349  | -           | Phage-related protein            | 2.818                          | 0.000   |
| PD2010  | -           | tRNA-Thr                         | 2.796                          | 0.000   |
| PD0790  | <i>traC</i> | DNA primase                      | 2.785                          | 0.000   |
| PD1119  | -           | Phage-related protein            | 2.765                          | 0.000   |
| PD2099  | -           | tRNA-Pro                         | 2.723                          | 0.000   |
| PD0510  | -           | tRNA-Lys                         | 2.709                          | 0.000   |

|        |             |                                                                 |       |       |
|--------|-------------|-----------------------------------------------------------------|-------|-------|
| PD1378 | <i>smpB</i> | SsrA-binding protein (Small protein B)                          | 2.66  | 0.000 |
| PD1191 | -           | Uncharacterized protein                                         | 2.655 | 0.000 |
| PD0872 | <i>isf</i>  | Iron-sulfur flavoprotein                                        | 2.591 | 0.000 |
| PD0047 | -           | tRNA-Arg                                                        | 2.518 | 0.000 |
| PD1409 | <i>grx</i>  | Glutaredoxin-like protein                                       | 2.483 | 0.000 |
| PD0956 | -           | Uncharacterized protein                                         | 2.459 | 0.000 |
| PD0944 | -           | tRNA-Lys                                                        | 2.389 | 0.001 |
| PD1215 | -           | Uncharacterized protein                                         | 2.382 | 0.000 |
| PD0875 | <i>paaK</i> | Frame shift                                                     | 2.376 | 0.000 |
| PD1343 | <i>hicA</i> | HicA-related protein                                            | 2.337 | 0.000 |
| PD1079 | -           | Alkylated DNA repair                                            | 2.317 | 0.000 |
| PD0910 | -           | Uncharacterized protein                                         | 2.254 | 0.000 |
| PD1327 | -           | Uncharacterized protein                                         | 2.237 | 0.000 |
| PD0923 | -           | Phage-related protein                                           | 2.158 | 0.000 |
| PD0974 | -           | Uncharacterized protein                                         | 2.146 | 0.000 |
| PD1386 | -           | Response regulator                                              | 2.132 | 0.000 |
| PD0913 | -           | Uncharacterized protein                                         | 2.114 | 0.000 |
| PD1768 | -           | Threonylcarbamoyl-AMP synthase (TsaC)                           | 2.104 | 0.000 |
| PD2036 | <i>purE</i> | N5-carboxyaminoimidazole ribonucleotide mutase (N5-CAIR mutase) | 2.069 | 0.001 |
| PD0936 | -           | Phage-related protein                                           | 2.065 | 0.000 |
| PD0582 | <i>aroK</i> | Shikimate kinase (SK) (EC 2.7.1.71)                             | 2.053 | 0.000 |
| PD0909 | -           | Uncharacterized protein                                         | 2.041 | 0.003 |
| PD0929 | -           | Uncharacterized protein                                         | 2.038 | 0.000 |
| PD0916 | -           | Uncharacterized protein                                         | 2.02  | 0.000 |
| PD0926 | -           | Phage-related protein                                           | 2.012 | 0.000 |
| PD1252 | -           | Uncharacterized protein                                         | 1.981 | 0.000 |
| PD0125 | -           | Cysteine protease                                               | 1.953 | 0.000 |
| PD2100 | -           | tRNA-Arg                                                        | 1.952 | 0.001 |
| PD0960 | <i>parE</i> | Plasmid stabilization protein                                   | 1.944 | 0.000 |
| PD0640 | -           | Lipopolysaccharide export system protein LptC                   | 1.934 | 0.000 |
| PD0912 | -           | Phage-related protein                                           | 1.912 | 0.003 |
| PD0092 | <i>lexA</i> | LexA repressor (EC 3.4.21.88)                                   | 1.9   | 0.000 |
| PD1086 | -           | Uncharacterized protein                                         | 1.897 | 0.000 |
| PD2105 | -           | Uncharacterized protein                                         | 1.845 | 0.000 |
| PD0961 | <i>parD</i> | Plasmid stabilization protein                                   | 1.839 | 0.000 |
| PD1024 | <i>amtB</i> | Ammonium transporter                                            | 1.798 | 0.000 |
| PD1486 | -           | Uncharacterized protein                                         | 1.79  | 0.000 |
| PD2011 | -           | tRNA-Gly                                                        | 1.779 | 0.000 |
| PD0922 | -           | Uncharacterized protein                                         | 1.768 | 0.004 |
| PD0959 | -           | Phage-related protein                                           | 1.749 | 0.000 |
| PD0932 | -           | Uncharacterized protein                                         | 1.741 | 0.000 |
| PD0998 | -           | Uncharacterized protein                                         | 1.733 | 0.000 |
| PD0388 | <i>cls</i>  | Cardiolipin synthase                                            | 1.732 | 0.000 |
| PD0296 | <i>proB</i> | Glutamate 5-kinase (Gamma-glutamyl kinase) (GK)                 | 1.727 | 0.003 |
| PD0931 | -           | Uncharacterized protein                                         | 1.692 | 0.000 |

|        |             |                                                                          |       |       |
|--------|-------------|--------------------------------------------------------------------------|-------|-------|
| PD0609 | -           | Uncharacterized protein                                                  | 1.69  | 0.000 |
| PD1400 | -           | Uncharacterized protein                                                  | 1.684 | 0.000 |
| PD0939 | -           | Phage-related protein                                                    | 1.677 | 0.001 |
| PD1161 | -           | Uncharacterized protein                                                  | 1.66  | 0.002 |
| PD0876 | <i>trpD</i> | Anthranilate synthase component II                                       | 1.628 | 0.000 |
| PD0877 | <i>trpE</i> | Pseudogene                                                               | 1.597 | 0.000 |
| PD0085 | <i>map</i>  | Methionine aminopeptidase (MAP) (MetAP)<br>(Peptidase M)                 | 1.578 | 0.000 |
| PD1074 | -           | Uncharacterized protein                                                  | 1.55  | 0.006 |
| PD0071 | <i>ftsJ</i> | Ribosomal RNA large subunit<br>methyltransferase E                       | 1.538 | 0.000 |
| PD1433 | -           | Fascin-like domain motif-containing<br>2,3-bisphosphoglycerate-dependent | 1.538 | 0.014 |
| PD0898 | <i>gpmA</i> | phosphoglycerate mutase (BPG-dependent<br>PGAM)                          | 1.523 | 0.000 |
| PD1279 | <i>dnaJ</i> | DnaJ protein                                                             | 1.523 | 0.000 |
| PD1334 | -           | IS1327 transposase                                                       | 1.514 | 0.000 |
| PD0906 | -           | Phage-related protein                                                    | 1.505 | 0.000 |
| PD0969 | -           | Phage-related protein                                                    | 1.498 | 0.000 |
| PD0935 | -           | Phage-related protein                                                    | 1.494 | 0.000 |
| PD1239 | -           | Uncharacterized protein                                                  | 1.483 | 0.001 |
| PD1819 | -           | Lipoprotein                                                              | 1.445 | 0.000 |
| PD1334 | -           | Uncharacterized protein                                                  | 1.445 | 0.012 |
| PD0587 | -           | Uncharacterized protein                                                  | 1.434 | 0.001 |
| PD0307 | -           | Toxin                                                                    | 1.426 | 0.004 |
| PD0938 | -           | Phage-related protein                                                    | 1.421 | 0.005 |
| PD1831 | -           | Uncharacterized protein                                                  | 1.416 | 0.015 |
| PD1955 | <i>pgpB</i> | Phosphatidylglycerophosphatase B                                         | 1.411 | 0.000 |
| PD2109 | -           | Uncharacterized protein                                                  | 1.404 | 0.016 |
| PD1183 | -           | Anti-toxin protein                                                       | 1.397 | 0.000 |
| PD1146 | <i>spsQ</i> | Glycosyl transferase                                                     | 1.393 | 0.000 |
| PD0955 | -           | Uncharacterized protein                                                  | 1.365 | 0.001 |
| PD0992 | -           | Phage-related protein                                                    | 1.357 | 0.009 |
| PD1908 | -           | tRNA-Pro                                                                 | 1.35  | 0.011 |
| PD1177 | -           | Uncharacterized protein                                                  | 1.328 | 0.000 |
| PD1153 | <i>algR</i> | Two-component system, regulatory protein                                 | 1.316 | 0.000 |
| PD0235 | -           | Uncharacterized protein                                                  | 1.313 | 0.000 |
| PD1341 | <i>vapI</i> | Virulence-associated protein                                             | 1.304 | 0.001 |
| PD1159 | -           | Transcriptional regulator                                                | 1.296 | 0.001 |
| PD1975 | <i>ogt</i>  | Methylated-DNA--protein-cysteine<br>methyltransferase                    | 1.295 | 0.000 |
| PD0940 | -           | Uncharacterized protein                                                  | 1.285 | 0.045 |
| PD1861 | <i>ftsZ</i> | Cell division protein FtsZ                                               | 1.274 | 0.000 |
| PD0024 | <i>pilE</i> | PilE protein                                                             | 1.262 | 0.000 |
| PD1830 | -           | Frame shift                                                              | 1.248 | 0.000 |
| PD0339 | -           | tRNA-Leu                                                                 | 1.244 | 0.014 |
| PD0733 | <i>xpsF</i> | General secretory pathway protein F                                      | 1.222 | 0.000 |
| PD0599 | <i>ctaA</i> | Cytochrome oxidase assembly protein                                      | 1.207 | 0.001 |
| PD0470 | -           | tRNA-Leu                                                                 | 1.202 | 0.004 |

|        |              |                                                                   |       |       |
|--------|--------------|-------------------------------------------------------------------|-------|-------|
| PD0370 | -            | Uncharacterized protein                                           | 1.193 | 0.000 |
| PD0975 | -            | Phage-related protein                                             | 1.192 | 0.000 |
| PD0982 | -            | Phage-related protein                                             | 1.186 | 0.000 |
| PD1006 | <i>fic</i>   | Cell filamentation protein                                        | 1.181 | 0.001 |
| PD1717 | -            | Uncharacterized protein                                           | 1.181 | 0.002 |
| PD1825 | -            | Peptide methionine sulfoxide reductase MsrB                       | 1.169 | 0.007 |
| PD1815 | -            | Uncharacterized protein                                           | 1.165 | 0.001 |
| PD2034 | -            | Glutaredoxin                                                      | 1.161 | 0.001 |
| PD0090 | -            | Uncharacterized protein                                           | 1.159 | 0.002 |
| PD2021 | <i>hemaA</i> | Glutamyl-tRNA reductase (GluTR) (EC 1.2.1.70)                     | 1.159 | 0.002 |
| PD1689 | <i>yjdB</i>  | Inner membrane protein                                            | 1.156 | 0.000 |
| PD1534 | <i>thiD</i>  | Phosphomethylpyrimidine kinase                                    | 1.156 | 0.001 |
| PD1243 | -            | Uncharacterized protein                                           | 1.148 | 0.030 |
| PD2048 | <i>rpoH</i>  | RNA polymerase sigma factor RpoH (RNA polymerase sigma-32 factor) | 1.141 | 0.001 |
| PD1023 | <i>traE</i>  | DNA topoisomerase (EC 5.99.1.2)                                   | 1.134 | 0.000 |
| PD1668 | -            | Uncharacterized protein                                           | 1.134 | 0.000 |
| PD0953 | <i>traE</i>  | Frame shift                                                       | 1.133 | 0.000 |
| PD1715 | -            | Uncharacterized protein                                           | 1.128 | 0.000 |
| PD1803 | -            | Uncharacterized protein                                           | 1.114 | 0.003 |
| PD1397 | <i>leuB</i>  | 3-isopropylmalate dehydrogenase (EC 1.1.1.85) (3-IPM-DH)          | 1.113 | 0.000 |
| PD0952 | <i>traD</i>  | Conjugal transfer protein                                         | 1.111 | 0.000 |
| PD0708 | -            | Virulence regulator                                               | 1.111 | 0.000 |
| PD0592 | <i>htrB</i>  | Lipid A biosynthesis lauroyl acyltransferase                      | 1.094 | 0.000 |
| PD0732 | <i>xpsE</i>  | General secretory pathway protein E                               | 1.084 | 0.012 |
| PD0075 | -            | Uncharacterized protein                                           | 1.082 | 0.001 |
| PD1956 | <i>ispG</i>  | 4-hydroxy-3-methylbut-2-en-1-yl diphosphate synthase (flavodoxin) | 1.082 | 0.003 |
| PD1676 | -            | tRNA-Gln                                                          | 1.075 | 0.010 |
| PD0712 | -            | Transposase                                                       | 1.074 | 0.000 |
| PD0796 | -            | Uncharacterized protein                                           | 1.059 | 0.002 |
| PD1763 | <i>def</i>   | Peptide deformylase (PDF) (EC 3.5.1.88) (Polypeptide deformylase) | 1.056 | 0.002 |
| PD0673 | -            | ATPase                                                            | 1.054 | 0.001 |
| PD1686 | -            | Rubredoxin                                                        | 1.053 | 0.049 |
| PD2116 | <i>pspA</i>  | Hemagglutinin-like secreted protein                               | 1.039 | 0.001 |
| PD1005 | -            | Phage-related repressor protein                                   | 1.032 | 0.001 |
| PD2077 | <i>rhtC</i>  | Amino acid transporter                                            | 1.029 | 0.001 |
| PD1781 | -            | Endoribonuclease YbeY (EC 3.1.-.-)                                | 1.027 | 0.000 |
| PD1948 | -            | Uncharacterized protein                                           | 1.021 | 0.001 |
| PD0829 | -            | Uncharacterized protein                                           | 1.02  | 0.001 |
| PD1312 | -            | Uncharacterized protein                                           | 1.017 | 0.001 |
| PD1853 | -            | Zinc protease                                                     | 1.008 | 0.009 |
| PD0871 | -            | Trp operon repressor homolog                                      | 1.002 | 0.009 |
| PD0991 | -            | Phage-related protein                                             | 0.999 | 0.023 |
| PD0148 | <i>cvH</i>   | Glycine cleavage system H protein                                 | 0.998 | 0.000 |
| PD0329 | <i>cdsA</i>  | Phosphatidate cytidyltransferase (EC                              | 0.998 | 0.001 |



## 2.7.7.41)

|        |             |                                                                                   |       |       |
|--------|-------------|-----------------------------------------------------------------------------------|-------|-------|
| PD1616 | -           | Uncharacterized protein                                                           | 0.997 | 0.000 |
| PD1533 | -           | Uncharacterized protein                                                           | 0.996 | 0.024 |
| PD1465 | <i>malF</i> | ABC transporter sugar permease                                                    | 0.989 | 0.005 |
| PD1546 | <i>mtfA</i> | Mannosyltransferase                                                               | 0.988 | 0.001 |
| PD0453 | <i>rplR</i> | 50S ribosomal protein L18                                                         | 0.97  | 0.026 |
| PD1184 | -           | Toxin-like protein                                                                | 0.969 | 0.001 |
| PD1439 | <i>mviN</i> | Putative lipid II flippase MurJ                                                   | 0.966 | 0.008 |
| PD1467 | -           | Uncharacterized protein                                                           | 0.963 | 0.015 |
| PD1890 | -           | Beta-lactamase hydrolase-like protein (EC 3.-.-)                                  | 0.956 | 0.001 |
| PD0054 | -           | Uncharacterized protein                                                           | 0.95  | 0.001 |
| PD0204 | -           | Uncharacterized protein                                                           | 0.946 | 0.001 |
| PD1642 | <i>folB</i> | 7,8-dihydroneopterin aldolase (EC 4.1.2.25)                                       | 0.945 | 0.003 |
| PD1120 | -           | Phage-related protein                                                             | 0.944 | 0.012 |
| PD1067 | -           | Uncharacterized protein                                                           | 0.94  | 0.005 |
| PD0270 | <i>oprO</i> | Polyphosphate-selective porin O                                                   | 0.932 | 0.002 |
| PD2106 | -           | Uncharacterized protein                                                           | 0.931 | 0.014 |
| PD0873 | -           | Uncharacterized protein                                                           | 0.926 | 0.017 |
| PD1431 | -           | Uncharacterized protein                                                           | 0.917 | 0.022 |
| PD0830 | <i>yibK</i> | tRNA (cytidine/uridine-2'-O-)-methyltransferase TrmL                              | 0.909 | 0.001 |
| PD1840 | <i>cysG</i> | Siroheme synthase                                                                 | 0.903 | 0.006 |
| PD1408 | -           | Autolytic lysozyme                                                                | 0.899 | 0.025 |
| PD0314 | -           | Uncharacterized protein                                                           | 0.898 | 0.006 |
| PD1536 | <i>cutA</i> | Periplasmic divalent cation tolerance protein                                     | 0.897 | 0.042 |
| PD0917 | -           | Uncharacterized protein                                                           | 0.893 | 0.004 |
| PD0295 | <i>argH</i> | Argininosuccinate lyase (ASAL) (EC 4.3.2.1) (Arginosuccinase)                     | 0.893 | 0.013 |
| PD0930 | -           | Phage-related protein                                                             | 0.887 | 0.002 |
| PD1418 | -           | Uncharacterized protein                                                           | 0.883 | 0.026 |
| PD1805 | <i>yecS</i> | ABC transporter permease protein                                                  | 0.882 | 0.002 |
| PD0039 | -           | Uncharacterized protein                                                           | 0.88  | 0.006 |
| PD2047 | <i>priA</i> | Primosomal protein N' (EC 3.6.4.-) (ATP-dependent helicase PriA)                  | 0.875 | 0.002 |
| PD1358 | <i>serC</i> | Phosphoserine aminotransferase                                                    | 0.874 | 0.003 |
| PD0068 | <i>folP</i> | Dihydropteroate synthase (DHPS) (EC 2.5.1.15) (Dihydropteroate pyrophosphorylase) | 0.872 | 0.015 |
| PD1800 | <i>yadF</i> | Carbonic anhydrase (EC 4.2.1.1) (Carbonate dehydratase)                           | 0.871 | 0.000 |
| PD0098 | <i>cysK</i> | Cysteine synthase                                                                 | 0.871 | 0.001 |
| PD1924 | <i>pilA</i> | Fimbrial protein                                                                  | 0.871 | 0.037 |
| PD1371 | <i>grpE</i> | Protein GrpE (HSP-70 cofactor)                                                    | 0.866 | 0.018 |
| PD0933 | -           | Phage-related protein                                                             | 0.853 | 0.001 |
| PD0361 | <i>msbA</i> | Lipid A export ATP-binding/permease protein MsbA (EC 3.6.3.-)                     | 0.853 | 0.005 |
| PD0738 | <i>pefK</i> | General secretory pathway protein K                                               | 0.851 | 0.005 |
| PD0422 | <i>wrbA</i> | Tryptophan repressor binding protein                                              | 0.851 | 0.010 |
| PD0825 | <i>ampE</i> | Transmembrane protein                                                             | 0.849 | 0.002 |

|        |              |                                                                                  |       |       |
|--------|--------------|----------------------------------------------------------------------------------|-------|-------|
| PD1452 | -            | Lipopolysaccharide core biosynthesis protein                                     | 0.846 | 0.001 |
| PD0426 | <i>pheA</i>  | Chorismate mutase (EC 5.4.99.5)                                                  | 0.845 | 0.045 |
| PD1787 | -            | Uncharacterized protein                                                          | 0.838 | 0.004 |
| PD1464 | <i>malG</i>  | ABC transporter sugar permease                                                   | 0.836 | 0.002 |
| PD1307 | -            | Uncharacterized protein                                                          | 0.834 | 0.000 |
| PD0305 | <i>frpC</i>  | Hemolysin-type calcium binding protein                                           | 0.83  | 0.024 |
| PD0943 | -            | Phage-related protein                                                            | 0.826 | 0.003 |
| PD0126 | -            | Uncharacterized protein                                                          | 0.822 | 0.009 |
| PD1196 | <i>int</i>   | Phage-related integrase                                                          | 0.816 | 0.001 |
| PD1785 | <i>corA</i>  | Magnesium and cobalt transport protein                                           | 0.816 | 0.041 |
| PD0529 | <i>guxA</i>  | Glucanase (EC 3.2.1.-)                                                           | 0.81  | 0.009 |
| PD0297 | <i>proA</i>  | Gamma-glutamyl phosphate reductase (GPR)                                         | 0.808 | 0.005 |
| PD0323 | <i>lpxA</i>  | Acyl-[acyl-carrier-protein]-UDP-N-acetylglucosamine O-acyltransferase            | 0.807 | 0.023 |
| PD0562 | <i>queA</i>  | S-adenosylmethionine:tRNA ribosyltransferase-isomerase                           | 0.806 | 0.032 |
| PD1125 | -            | Uncharacterized protein                                                          | 0.805 | 0.019 |
| PD1076 | -            | Uncharacterized protein                                                          | 0.803 | 0.012 |
| PD0362 | <i>lpxK</i>  | Tetraacyldisaccharide 4'-kinase (EC 2.7.1.130) (Lipid A 4'-kinase)               | 0.802 | 0.002 |
| PD1349 | -            | Conjugal transfer protein                                                        | 0.801 | 0.017 |
| PD1611 | <i>pilY1</i> | Type IV pilus biogenesis factor PilY1 homolog PD_1611                            | 0.8   | 0.008 |
| PD0610 | <i>truA</i>  | tRNA pseudouridine synthase A (EC 5.4.99.12)                                     | 0.798 | 0.008 |
| PD0045 | -            | Uncharacterized protein                                                          | 0.798 | 0.013 |
| PD1735 | <i>fimT</i>  | Type 4 fimbrial biogenesis protein                                               | 0.796 | 0.014 |
| PD1525 | -            | Peptidyl-prolyl cis-trans isomerase (EC 5.2.1.8)                                 | 0.795 | 0.005 |
| PD1438 | <i>ribF</i>  | Riboflavin biosynthesis protein (EC 2.7.1.26) (EC 2.7.7.2)                       | 0.793 | 0.010 |
| PD2113 | -            | Uncharacterized protein                                                          | 0.787 | 0.032 |
| PD0032 | -            | Uncharacterized protein                                                          | 0.784 | 0.016 |
| PD2041 | <i>rep</i>   | ATP-dependent DNA helicase Rep (EC 3.6.4.12)                                     | 0.781 | 0.003 |
| PD1169 | <i>btuE</i>  | Glutathione peroxidase                                                           | 0.779 | 0.044 |
| PD1253 | <i>efp</i>   | Elongation factor P-like protein                                                 | 0.778 | 0.024 |
| PD0818 | <i>yneN</i>  | Thioredoxin                                                                      | 0.777 | 0.015 |
| PD1681 | -            | tRNA-dihydrouridine(20/20a) synthase                                             | 0.775 | 0.011 |
| PD1604 | -            | Uncharacterized protein                                                          | 0.774 | 0.017 |
| PD1228 | -            | Uncharacterized protein                                                          | 0.772 | 0.008 |
| PD0879 | -            | Uncharacterized protein                                                          | 0.771 | 0.002 |
| PD1151 | -            | Uncharacterized protein                                                          | 0.77  | 0.005 |
| PD1817 | <i>surE</i>  | 5'-nucleotidase SurE (EC 3.1.3.5) (Nucleoside 5'-monophosphate phosphohydrolase) | 0.768 | 0.032 |
| PD1100 | -            | Uncharacterized protein                                                          | 0.766 | 0.006 |
| PD2104 | -            | Uncharacterized protein                                                          | 0.766 | 0.010 |
| PD1690 | -            | Transmembrane protein                                                            | 0.761 | 0.006 |
| PD0070 | <i>hflB</i>  | ATP-dependent zinc metalloprotease FtsH (EC 3.4.24.-)                            | 0.76  | 0.035 |
| PD0561 | <i>mrdB</i>  | Rod shape-determining protein                                                    | 0.759 | 0.003 |

|        |             |                                                                                |       |       |
|--------|-------------|--------------------------------------------------------------------------------|-------|-------|
| PD2110 | <i>pspA</i> | Hemagglutinin-like secreted protein                                            | 0.758 | 0.006 |
| PD0093 | <i>recA</i> | Protein RecA (Recombinase A)                                                   | 0.755 | 0.001 |
| PD1769 | <i>lpxA</i> | Acyl-[ACP]-UDP-N-acetylglucosamine                                             | 0.754 | 0.006 |
| PD0899 | <i>nfi</i>  | Endonuclease V (DNase V)                                                       | 0.751 | 0.006 |
| PD1957 | <i>actS</i> | Two-component system, sensor protein                                           | 0.751 | 0.011 |
| PD1466 | <i>malE</i> | ABC transporter sugar-binding protein                                          | 0.75  | 0.001 |
| PD0928 | -           | Phage-related protein                                                          | 0.744 | 0.002 |
| PD0139 | -           | Uncharacterized protein                                                        | 0.744 | 0.004 |
| PD0669 | <i>trxB</i> | Thioredoxin reductase (EC 1.8.1.9)                                             | 0.74  | 0.006 |
| PD0945 | <i>exsB</i> | 7-cyano-7-deazaguanine synthase (EC 6.3.4.20)                                  | 0.74  | 0.014 |
| PD1139 | <i>int</i>  | Phage-related integrase                                                        | 0.737 | 0.000 |
| PD1374 | <i>fur</i>  | Ferric uptake regulator                                                        | 0.736 | 0.008 |
| PD0332 | <i>fadL</i> | Fatty acid outer membrane porin                                                | 0.736 | 0.027 |
| PD0677 | <i>ptr1</i> | Pteridine reductase 1                                                          | 0.735 | 0.035 |
| PD0535 | -           | Uncharacterized protein                                                        | 0.732 | 0.020 |
| PD0646 | -           | Uncharacterized protein                                                        | 0.731 | 0.002 |
| PD0378 | <i>gp4</i>  | Phage-related portal protein                                                   | 0.727 | 0.010 |
| PD0703 | -           | Pseudogene                                                                     | 0.725 | 0.011 |
| PD0574 | <i>cybB</i> | Cytochrome B561                                                                | 0.722 | 0.002 |
| PD1820 | <i>nlpD</i> | Lipoprotein                                                                    | 0.718 | 0.004 |
| PD1135 | -           | Uncharacterized protein                                                        | 0.715 | 0.024 |
| PD0386 | -           | Uncharacterized protein                                                        | 0.714 | 0.004 |
| PD0380 | -           | Phage-related protein                                                          | 0.711 | 0.018 |
| PD1804 | <i>metN</i> | Methionine import ATP-binding protein MetN (EC 3.6.3.-)                        | 0.71  | 0.005 |
| PD1797 | -           | Uncharacterized protein                                                        | 0.706 | 0.046 |
| PD0954 | -           | Uncharacterized protein                                                        | 0.705 | 0.024 |
| PD0915 | -           | Uncharacterized protein                                                        | 0.704 | 0.005 |
| PD0444 | <i>rplP</i> | 50S ribosomal protein L16                                                      | 0.704 | 0.015 |
| PD0679 | -           | Uncharacterized protein                                                        | 0.704 | 0.023 |
| PD0434 | -           | ATP synthase subunit a (ATP synthase F0 sector subunit a) (F-ATPase subunit 6) | 0.699 | 0.010 |
| PD0608 | <i>asd</i>  | Aspartate-semialdehyde dehydrogenase (ASA dehydrogenase)                       | 0.697 | 0.028 |
| PD1627 | <i>purA</i> | Adenylosuccinate synthetase (AMPSase) (IMP--aspartate ligase)                  | 0.696 | 0.006 |
| PD0578 | -           | Uncharacterized protein                                                        | 0.694 | 0.007 |
| PD2072 | <i>hsdM</i> | Type I restriction-modification system DNA methylase                           | 0.694 | 0.014 |
| PD0967 | -           | Phage-related protein                                                          | 0.692 | 0.010 |
| PD0076 | -           | Glycosyl transferase                                                           | 0.691 | 0.006 |
| PD1062 | -           | Uncharacterized protein                                                        | 0.691 | 0.010 |
| PD1322 | <i>dpoL</i> | Phage-related DNA polymerase                                                   | 0.691 | 0.011 |
| PD1192 | -           | Uncharacterized protein                                                        | 0.689 | 0.036 |
| PD1010 | -           | Uncharacterized protein                                                        | 0.687 | 0.003 |
| PD0520 | <i>attO</i> | Transcriptional regulator AraC family                                          | 0.687 | 0.030 |
| PD0667 | <i>aat</i>  | Leucyl/phenylalanyl-tRNA--protein transferase                                  | 0.684 | 0.009 |
| PD0850 | -           | Uncharacterized protein                                                        | 0.684 | 0.025 |

|        |             |                                                                       |       |       |
|--------|-------------|-----------------------------------------------------------------------|-------|-------|
| PD0145 | <i>yjjV</i> | Deoxyribonuclease                                                     | 0.679 | 0.008 |
| PD0315 | <i>gaa</i>  | Glutaryl-7-ACA acylase                                                | 0.677 | 0.008 |
| PD0869 | <i>nadA</i> | Quinolinate synthase A (EC 2.5.1.72)                                  | 0.677 | 0.019 |
| PD0309 | <i>ate1</i> | Putative arginyl-tRNA--protein transferase (Arginyltransferase)       | 0.672 | 0.030 |
| PD1080 | -           | Uncharacterized protein                                               | 0.67  | 0.005 |
| PD1558 | <i>comE</i> | DNA transport competence protein                                      | 0.668 | 0.007 |
| PD0122 | <i>pyrE</i> | Orotate phosphoribosyltransferase (OPRT) (OPRTase) (EC 2.4.2.10)      | 0.668 | 0.014 |
| PD0678 | -           | Uncharacterized protein                                               | 0.666 | 0.020 |
| PD0777 | <i>aspH</i> | Aspartyl/asparaginyl beta-hydroxylase                                 | 0.657 | 0.005 |
| PD1235 | <i>mltB</i> | Membrane-bound lytic transglycosylase                                 | 0.652 | 0.022 |
| PD0097 | <i>prlC</i> | Oligopeptidase A                                                      | 0.651 | 0.036 |
| PD0384 | <i>int</i>  | Phage-related integrase                                               | 0.65  | 0.003 |
| PD1163 | -           | Fructokinase                                                          | 0.65  | 0.015 |
| PD1296 | <i>acs</i>  | Acetyl-coenzyme A synthetase (AcCoA synthetase)                       | 0.649 | 0.024 |
| PD0990 | <i>int</i>  | Phage-related integrase                                               | 0.648 | 0.047 |
| PD1257 | <i>potE</i> | Cationic amino acid transporter                                       | 0.647 | 0.008 |
| PD1204 | <i>pstA</i> | Phosphate transport system permease protein PstA                      | 0.646 | 0.019 |
| PD1459 | -           | Uncharacterized protein                                               | 0.642 | 0.007 |
| PD1042 | <i>prc</i>  | Tail-specific protease                                                | 0.642 | 0.014 |
| PD0117 | <i>radC</i> | UPF0758 protein PD_0117                                               | 0.641 | 0.018 |
| PD0803 | <i>pepP</i> | Aminopeptidase P                                                      | 0.638 | 0.015 |
| PD1855 | -           | Uncharacterized protein                                               | 0.633 | 0.006 |
| PD0843 | <i>tonB</i> | TonB protein                                                          | 0.632 | 0.007 |
| PD0653 | -           | Ion transporter 33.9 kDa                                              | 0.629 | 0.007 |
| PD1641 | -           | Uncharacterized protein                                               | 0.628 | 0.007 |
| PD0720 | <i>gmk</i>  | Guanylate kinase (EC 2.7.4.8) (GMP kinase)                            | 0.628 | 0.042 |
| PD0997 | -           | Uncharacterized protein                                               | 0.626 | 0.006 |
| PD1749 | -           | Frame shift                                                           | 0.625 | 0.039 |
| PD1308 | <i>metE</i> | 5-methyltetrahydropteroyltriglutamate--homocysteine methyltransferase | 0.615 | 0.017 |
| PD1209 | <i>apaG</i> | Protein ApaG                                                          | 0.614 | 0.033 |
| PD0709 | -           | UPF0162 protein PD_0709                                               | 0.608 | 0.026 |
| PD0418 | <i>tldD</i> | TldD protein                                                          | 0.607 | 0.033 |
| PD1728 | -           | Phage-related protein                                                 | 0.607 | 0.046 |
| PD0648 | -           | Uncharacterized protein                                               | 0.606 | 0.015 |
| PD1224 | -           | Uncharacterized protein                                               | 0.606 | 0.030 |
| PD0604 | <i>psd</i>  | Phosphatidylserine decarboxylase proenzyme (EC 4.1.1.65)              | 0.606 | 0.038 |
| PD0150 | -           | Uncharacterized protein                                               | 0.605 | 0.025 |
| PD0645 | -           | Uncharacterized protein                                               | 0.604 | 0.013 |
| PD0146 | -           | Outer membrane protein                                                | 0.601 | 0.031 |
| PD1954 | -           | Uncharacterized protein                                               | 0.6   | 0.012 |
| PD1043 | <i>ilvC</i> | Ketol-acid reductoisomerase                                           | 0.599 | 0.038 |
| PD1892 | -           | UPF0394 membrane protein PD_1892                                      | 0.597 | 0.043 |
| PD0501 | <i>yadG</i> | ABC transporter ATP-binding protein                                   | 0.595 | 0.039 |

|        |              |                                                                            |       |       |
|--------|--------------|----------------------------------------------------------------------------|-------|-------|
| PD1783 | <i>corC</i>  | Magnesium and cobalt efflux protein                                        | 0.593 | 0.050 |
| PD0069 | -            | Uncharacterized protein                                                    | 0.588 | 0.037 |
| PD2079 | -            | Uncharacterized protein                                                    | 0.586 | 0.009 |
| PD0711 | <i>yncD</i>  | TonB-dependent receptor                                                    | 0.586 | 0.012 |
| PD1342 | <i>hicB</i>  | HicB-related protein                                                       | 0.582 | 0.022 |
| PD0671 | -            | Uncharacterized protein                                                    | 0.581 | 0.010 |
| PD0701 | <i>hslV</i>  | ATP-dependent protease subunit HslV (EC 3.4.25.2)                          | 0.579 | 0.031 |
| PD2075 | <i>hsdS</i>  | Type I restriction-modification system specificity determinant             | 0.57  | 0.017 |
| PD0576 | -            | Histidine kinase/response regulator hybrid protein                         | 0.569 | 0.010 |
| PD1692 | <i>pilP</i>  | Fimbrial assembly protein                                                  | 0.566 | 0.021 |
| PD0445 | <i>rpmC</i>  | 50S ribosomal protein L29                                                  | 0.565 | 0.032 |
| PD1794 | -            | Uncharacterized protein                                                    | 0.563 | 0.045 |
| PD1818 | <i>pcm</i>   | Protein-L-isoaspartate O-methyltransferase                                 | 0.559 | 0.007 |
| PD1149 | -            | Transcriptional regulator                                                  | 0.559 | 0.018 |
| PD1929 | <i>pilS</i>  | Two-component system, sensor protein                                       | 0.543 | 0.029 |
| PD1643 | <i>gcp</i>   | tRNA N6-adenosine threonylcarbamoyltransferase                             | 0.541 | 0.021 |
| PD1949 | <i>rfbD</i>  | Transport permease protein                                                 | 0.541 | 0.035 |
| PD1771 | -            | Uncharacterized protein                                                    | 0.54  | 0.048 |
| PD0676 | <i>folK</i>  | 2-amino-4-hydroxy-6-hydroxymethyldihydropteridine pyrophosphokinase        | 0.536 | 0.020 |
| PD0591 | <i>cysA</i>  | Sulfate/thiosulfate import ATP-binding protein CysA                        | 0.536 | 0.040 |
| PD0532 | -            | UPF0250 protein PD_0532                                                    | 0.529 | 0.036 |
| PD0767 | -            | Uncharacterized protein                                                    | 0.527 | 0.017 |
| PD0797 | <i>rpiA</i>  | Ribose-5-phosphate isomerase A (EC 5.3.1.6) (Phosphoriboisomerase A) (PRI) | 0.526 | 0.023 |
| PD0261 | <i>nuoN</i>  | NADH-quinone oxidoreductase subunit N                                      | 0.522 | 0.031 |
| PD1129 | -            | Uncharacterized protein                                                    | 0.52  | 0.045 |
| PD0564 | -            | Uncharacterized protein                                                    | 0.518 | 0.047 |
| PD0163 | -            | Uncharacterized protein                                                    | 0.514 | 0.039 |
| PD1158 | -            | Uncharacterized protein                                                    | 0.514 | 0.046 |
| PD2059 | -            | Peptidase                                                                  | 0.512 | 0.042 |
| PD1683 | -            | Uncharacterized protein                                                    | 0.509 | 0.022 |
| PD0889 | <i>ruvB</i>  | Holliday junction ATP-dependent DNA helicase RuvB (EC 3.6.4.12)            | 0.509 | 0.037 |
| PD0387 | -            | Uncharacterized protein                                                    | 0.509 | 0.045 |
| PD0023 | <i>pilY1</i> | Type IV pilus biogenesis factor PilY1 homolog PD_0023                      | 0.503 | 0.038 |
| PD1401 | <i>queF</i>  | NADPH-dependent 7-cyano-7-deazaguanine reductase                           | 0.503 | 0.043 |
| PD2022 | <i>prfA</i>  | Peptide chain release factor 1 (RF-1)                                      | 0.494 | 0.023 |
| PD0721 | -            | Alpha helix protein                                                        | 0.491 | 0.046 |
| PD0865 | -            | Frame shift                                                                | 0.49  | 0.026 |
| PD1917 | -            | Uncharacterized protein                                                    | 0.489 | 0.019 |
| PD1976 | <i>enpP</i>  | Phosphodiesterase-nucleotide pyrophosphatase                               | 0.476 | 0.035 |

|        |              |                                                                        |        |       |
|--------|--------------|------------------------------------------------------------------------|--------|-------|
| PD0702 | <i>hslU</i>  | Pseudogene                                                             | 0.475  | 0.045 |
| PD1154 | <i>algZ</i>  | Two-component system, sensor protein                                   | 0.466  | 0.050 |
| PD1503 | <i>fabG</i>  | 3-oxoacyl-[ACP] reductase                                              | 0.463  | 0.048 |
| PD0328 | <i>dxr</i>   | 1-deoxy-D-xylulose 5-phosphate reductoisomerase (DXP reductoisomerase) | 0.453  | 0.047 |
| PD1200 | <i>bfeA</i>  | Ferric enterobactin receptor                                           | 0.447  | 0.042 |
| PD1152 | <i>hemC</i>  | Porphobilinogen deaminase (PBG)                                        | 0.44   | 0.039 |
| PD1451 | <i>capD</i>  | Epimerase/dehydratase protein                                          | 0.433  | 0.043 |
| PD1832 | -            | Uncharacterized antigen                                                | 0.417  | 0.050 |
| PD0089 | <i>asnB</i>  | Asparagine synthase B                                                  | -0.437 | 0.043 |
| PD1742 | <i>thiL</i>  | Thiamine-monophosphate kinase (TMP kinase)                             | -0.448 | 0.039 |
| PD1548 | <i>cysM</i>  | Cystathionine beta-synthase                                            | -0.452 | 0.048 |
| PD0621 | <i>cyoD</i>  | Cytochrome O ubiquinol oxidase subunit IV                              | -0.457 | 0.047 |
| PD0742 | <i>xpsD</i>  | General secretory pathway protein D                                    | -0.461 | 0.038 |
| PD0840 | <i>glyQ</i>  | Glycine--tRNA ligase alpha subunit (EC 6.1.1.14)                       | -0.463 | 0.039 |
| PD1859 | -            | Uncharacterized protein                                                | -0.471 | 0.036 |
| PD0987 | -            | Uncharacterized protein                                                | -0.481 | 0.037 |
| PD0319 | <i>ahcY</i>  | Adenosylhomocysteinase (EC 3.3.1.1)                                    | -0.489 | 0.037 |
| PD1834 | <i>pdxA</i>  | 4-hydroxythreonine-4-phosphate dehydrogenase                           | -0.499 | 0.037 |
| PD1968 | <i>ppk</i>   | Polyphosphate kinase (EC 2.7.4.1)                                      | -0.506 | 0.025 |
| PD0281 | <i>pyrC</i>  | Dihydroorotase (EC 3.5.2.3)                                            | -0.513 | 0.020 |
| PD0333 | -            | Uncharacterized protein                                                | -0.515 | 0.043 |
| PD0061 | -            | Chaperone protein                                                      | -0.52  | 0.040 |
| PD1270 | <i>hisS</i>  | Histidine--tRNA ligase (EC 6.1.1.21)                                   | -0.525 | 0.031 |
| PD1213 | -            | 3-deoxy-D-manno-octulosonic acid kinase (Kdo kinase) (EC 2.7.1.166)    | -0.526 | 0.016 |
| PD0947 | <i>fumB</i>  | Fumarate hydratase                                                     | -0.526 | 0.026 |
| PD1729 | -            | Phage-related protein                                                  | -0.527 | 0.021 |
| PD1379 | -            | Uncharacterized protein                                                | -0.529 | 0.027 |
| PD1886 | -            | Uncharacterized protein                                                | -0.529 | 0.050 |
| PD1896 | -            | Uncharacterized protein                                                | -0.537 | 0.038 |
| PD0236 | <i>acnB</i>  | Aconitate hydratase B (EC 4.2.1.3)                                     | -0.537 | 0.039 |
| PD0086 | <i>dapD</i>  | 2,3,4,5-tetrahydropyridine-2,6-dicarboxylate N-succinyltransferase     | -0.541 | 0.028 |
| PD0414 | <i>omp28</i> | Outer membrane protein                                                 | -0.541 | 0.038 |
| PD0615 | -            | Luciferase                                                             | -0.546 | 0.050 |
| PD0442 | <i>rplV</i>  | 50S ribosomal protein L22                                              | -0.548 | 0.044 |
| PD2016 | <i>prsA</i>  | Ribose-phosphate pyrophosphokinase (RPPK)                              | -0.549 | 0.046 |
| PD0441 | <i>rpsS</i>  | 30S ribosomal protein S19                                              | -0.549 | 0.046 |
| PD2062 | <i>gltD</i>  | Glutamate synthase, beta subunit                                       | -0.552 | 0.028 |
| PD0120 | <i>algC</i>  | Phosphomannomutase                                                     | -0.553 | 0.009 |
| PD1286 | <i>mucD</i>  | Periplasmic protease                                                   | -0.553 | 0.023 |
| PD0420 | <i>pmbA</i>  | PmbA protein                                                           | -0.553 | 0.028 |
| PD2057 | <i>ctpA</i>  | Carboxyl-terminal protease                                             | -0.555 | 0.036 |
| PD0353 | <i>sdhB</i>  | Succinate dehydrogenase iron-sulfur subunit (EC 1.3.5.1)               | -0.557 | 0.048 |
| PD0381 | -            | Phage-related protein                                                  | -0.559 | 0.021 |

|        |              |                                                                      |        |       |
|--------|--------------|----------------------------------------------------------------------|--------|-------|
| PD2037 | -            | Uncharacterized protein                                              | -0.56  | 0.019 |
| PD2007 | <i>secE</i>  | Preprotein translocase SecE subunit                                  | -0.561 | 0.009 |
| PD1701 | <i>dnaB</i>  | Replicative DNA helicase (EC 3.6.4.12)                               | -0.565 | 0.023 |
| PD1862 | <i>ftsA</i>  | Cell division protein FtsA                                           | -0.566 | 0.033 |
| PD2071 | <i>hsdS</i>  | Type I restriction-modification system specificity determinant       | -0.567 | 0.021 |
| PD0543 | <i>eno</i>   | Enolase (EC 4.2.1.11)                                                | -0.579 | 0.048 |
| PD0228 | -            | Uncharacterized protein                                              | -0.583 | 0.013 |
| PD0174 | -            | Uncharacterized protein                                              | -0.583 | 0.028 |
| PD1225 | -            | Uncharacterized protein                                              | -0.584 | 0.018 |
| PD1635 | <i>proS</i>  | Proline--tRNA ligase (EC 6.1.1.15) (Prolyl-tRNA synthetase) (ProRS)  | -0.587 | 0.014 |
| PD1234 | -            | Ribosomal silencing factor RsfS                                      | -0.588 | 0.018 |
| PD0110 | <i>glmS</i>  | Glutamine--fructose-6-phosphate aminotransferase                     | -0.592 | 0.043 |
| PD0685 | <i>accD</i>  | Acetyl-coenzyme A carboxylase carboxyl transferase subunit beta      | -0.593 | 0.034 |
| PD0823 | <i>folE</i>  | GTP cyclohydrolase 1 (EC 3.5.4.16)                                   | -0.598 | 0.007 |
| PD0490 | <i>cls</i>   | Cardiolipin synthase                                                 | -0.598 | 0.022 |
| PD0399 | <i>carB</i>  | Carbamoyl-phosphate synthase large chain (EC 6.3.5.5)                | -0.604 | 0.041 |
| PD1659 | <i>vacJ</i>  | Lipoprotein                                                          | -0.605 | 0.015 |
| PD1695 | <i>pilM</i>  | Fimbrial assembly membrane protein                                   | -0.611 | 0.025 |
| PD0606 | <i>yfcB</i>  | 50S ribosomal protein L3 glutamine methyltransferase (L3 MTase)      | -0.613 | 0.017 |
| PD0001 | <i>dnaA</i>  | Chromosomal replication initiator protein DnaA                       | -0.615 | 0.037 |
| PD0496 | <i>cvaA</i>  | Colicin V secretion protein                                          | -0.617 | 0.026 |
| PD0033 | -            | Transcription-repair-coupling factor (TRCF)                          | -0.618 | 0.027 |
| PD1293 | <i>dxs</i>   | 1-deoxy-D-xylulose-5-phosphate synthase (EC 2.2.1.7)                 | -0.619 | 0.025 |
| PD0881 | <i>ftsY</i>  | Signal recognition particle receptor FtsY (SRP receptor)             | -0.619 | 0.030 |
| PD1935 | <i>gyrA</i>  | DNA gyrase subunit A (EC 5.99.1.3)                                   | -0.62  | 0.022 |
| PD0620 | <i>gcvP</i>  | Glycine dehydrogenase (decarboxylating)                              | -0.621 | 0.020 |
| PD2023 | <i>rlmL</i>  | Ribosomal RNA large subunit methyltransferase K/L                    | -0.621 | 0.041 |
| PD0282 | -            | Putative membrane protein insertion efficiency factor                | -0.623 | 0.013 |
| PD1751 | <i>yjjK</i>  | ABC transporter ATP-binding protein                                  | -0.623 | 0.013 |
| PD0344 | <i>pgl</i>   | 6-phosphogluconolactonase (6PGL) (EC 3.1.1.31)                       | -0.623 | 0.018 |
| PD1022 | -            | Uncharacterized protein                                              | -0.625 | 0.010 |
| PD1406 | <i>yahK</i>  | Alcohol dehydrogenase                                                | -0.627 | 0.029 |
| PD1654 | <i>ttg2A</i> | Toluene tolerance protein                                            | -0.632 | 0.014 |
| PD0461 | <i>rpoA</i>  | DNA-directed RNA polymerase subunit alpha (RNAP subunit alpha)       | -0.632 | 0.046 |
| PD0112 | <i>speE</i>  | Polyamine aminopropyltransferase (Putrescine aminopropyltransferase) | -0.634 | 0.017 |
| PD1972 | <i>grxC</i>  | Glutaredoxin                                                         | -0.634 | 0.017 |
| PD0784 | <i>acrA</i>  | Precursor of drug resistance protein                                 | -0.638 | 0.012 |
| PD0038 | <i>hmpA</i>  | Flavoheмоprotein (Flavoheмоglobin)                                   | -0.639 | 0.023 |

|        |             |                                                                                                |        |       |
|--------|-------------|------------------------------------------------------------------------------------------------|--------|-------|
|        |             | (Hemoglobin-like protein) (Nitric oxide dioxygenase)                                           |        |       |
| PD2053 | <i>rhIB</i> | ATP-dependent RNA helicase RhIB (EC 3.6.4.13)                                                  | -0.643 | 0.020 |
| PD0798 | -           | Uncharacterized protein                                                                        | -0.645 | 0.010 |
| PD1569 | <i>tmk</i>  | Thymidylate kinase (EC 2.7.4.9) (dTMP kinase)                                                  | -0.645 | 0.034 |
| PD1470 | -           | Segregation and condensation protein B                                                         | -0.646 | 0.006 |
| PD0832 | <i>fabH</i> | 3-oxoacyl-[ACP] synthase III                                                                   | -0.646 | 0.023 |
| PD0198 | <i>pnp</i>  | Polyribonucleotide nucleotidyltransferase (EC 2.7.7.8) (Polynucleotide phosphorylase) (PNPase) | -0.647 | 0.040 |
| PD1387 | <i>gumM</i> | GumM protein                                                                                   | -0.648 | 0.029 |
| PD1766 | -           | Protein Smg homolog                                                                            | -0.649 | 0.036 |
| PD1746 | <i>ribC</i> | Riboflavin synthase alpha chain                                                                | -0.65  | 0.019 |
| PD1823 | <i>alr</i>  | Alanine racemase (EC 5.1.1.1)                                                                  | -0.652 | 0.011 |
| PD0985 | -           | Uncharacterized protein                                                                        | -0.653 | 0.011 |
| PD1912 | <i>pheS</i> | Phenylalanine--tRNA ligase alpha subunit (EC 6.1.1.20) (PheRS)                                 | -0.661 | 0.006 |
| PD0437 | <i>rplC</i> | 50S ribosomal protein L3                                                                       | -0.661 | 0.028 |
| PD1277 | <i>dacC</i> | Penicillin-binding protein 6                                                                   | -0.663 | 0.016 |
| PD0792 | -           | Uncharacterized protein                                                                        | -0.665 | 0.024 |
| PD1910 | <i>ihfA</i> | Integration host factor subunit alpha (IHF-alpha)                                              | -0.667 | 0.003 |
| PD1744 | <i>ribH</i> | 6,7-dimethyl-8-ribityllumazine synthase (DMRL synthase) (LS) (Lumazine synthase) (EC 2.5.1.78) | -0.668 | 0.006 |
| PD1684 | -           | Uncharacterized protein                                                                        | -0.668 | 0.015 |
| PD1980 | <i>phhB</i> | Putative pterin-4-alpha-carbinolamine dehydratase (PHS)                                        | -0.67  | 0.007 |
| PD0697 | -           | Uncharacterized protein                                                                        | -0.67  | 0.016 |
| PD1606 | -           | Uncharacterized protein                                                                        | -0.673 | 0.027 |
| PD2015 | <i>rplY</i> | 50S ribosomal protein L25 (General stress protein CTC)                                         | -0.677 | 0.007 |
| PD0250 | <i>nuoC</i> | NADH-quinone oxidoreductase subunit C (EC 1.6.5.11) (NADH dehydrogenase I subunit C)           | -0.677 | 0.013 |
| PD0246 | <i>secG</i> | Protein-export membrane protein SecG                                                           | -0.679 | 0.006 |
| PD1849 | <i>zur</i>  | Transcriptional regulator Fur family                                                           | -0.681 | 0.012 |
| PD0783 | <i>acrF</i> | Multidrug-efflux transporter                                                                   | -0.684 | 0.015 |
| PD0245 | <i>tpiA</i> | Triosephosphate isomerase (TIM) (EC 5.3.1.1) (Triose-phosphate isomerase)                      | -0.693 | 0.002 |
| PD1554 | -           | Uncharacterized protein                                                                        | -0.697 | 0.027 |
| PD0058 | <i>mrkD</i> | Fimbrial adhesin                                                                               | -0.701 | 0.013 |
| PD0651 | <i>dsbC</i> | Disulfide isomerase                                                                            | -0.702 | 0.023 |
| PD1096 | <i>I</i>    | Phage-related tail protein                                                                     | -0.703 | 0.039 |
| PD0725 | -           | Uncharacterized protein                                                                        | -0.704 | 0.009 |
| PD0584 | <i>glnS</i> | Glutamine--tRNA ligase (EC 6.1.1.18) (Glutaminyl-tRNA synthetase) (GlnRS)                      | -0.705 | 0.009 |
| PD1587 | -           | Uncharacterized protein                                                                        | -0.705 | 0.023 |
| PD1662 | <i>nrtD</i> | Nitrate ABC transporter ATP-binding protein                                                    | -0.706 | 0.006 |
| PD0082 | <i>rimM</i> | Ribosome maturation factor RimM                                                                | -0.71  | 0.022 |
| PD0197 | <i>rpsO</i> | 30S ribosomal protein S15                                                                      | -0.713 | 0.008 |



|        |              |                                                                                                   |        |       |
|--------|--------------|---------------------------------------------------------------------------------------------------|--------|-------|
| PD1573 | -            | tRNA 2-thiocytidine biosynthesis protein TtcA                                                     | -0.715 | 0.006 |
| PD0081 | <i>rpsP</i>  | 30S ribosomal protein S16                                                                         | -0.717 | 0.009 |
| PD1321 | -            | Phage-related protein                                                                             | -0.717 | 0.042 |
| PD0487 | -            | Uncharacterized protein                                                                           | -0.718 | 0.007 |
| PD1490 | <i>efp</i>   | Elongation factor P (EF-P)                                                                        | -0.721 | 0.015 |
| PD2006 | <i>nusG</i>  | Transcription termination/antitermination protein NusG                                            | -0.721 | 0.020 |
| PD0401 | <i>rpfE</i>  | Regulatory protein                                                                                | -0.723 | 0.003 |
| PD1329 | -            | Uncharacterized protein                                                                           | -0.724 | 0.003 |
| PD0553 | -            | ABC transporter ATP-binding protein                                                               | -0.724 | 0.004 |
| PD1809 | <i>pdhB</i>  | Acetyltransferase component of pyruvate dehydrogenase complex (EC 2.3.1.12)                       | -0.725 | 0.003 |
| PD0986 | <i>pspA</i>  | Hemagglutinin-like secreted protein                                                               | -0.729 | 0.013 |
| PD1185 | -            | Phage-related protein                                                                             | -0.73  | 0.003 |
| PD1014 | -            | Phage-related protein                                                                             | -0.738 | 0.037 |
| PD0160 | -            | Uncharacterized protein                                                                           | -0.741 | 0.004 |
| PD1747 | <i>ribD</i>  | Riboflavin biosynthesis protein RibD                                                              | -0.741 | 0.038 |
| PD1061 | <i>dinD</i>  | DNA-damage-inducible protein D                                                                    | -0.743 | 0.002 |
| PD1745 | <i>ribA</i>  | GTP cyclohydrolase II                                                                             | -0.743 | 0.005 |
| PD1669 | -            | Uncharacterized protein                                                                           | -0.744 | 0.007 |
| PD1672 | <i>bfr</i>   | Bacterioferritin                                                                                  | -0.744 | 0.031 |
| PD0820 | <i>vacB</i>  | Ribonuclease R (RNase R) (EC 3.1.13.1)                                                            | -0.745 | 0.004 |
| PD0518 | -            | UPF0192 protein PD_0518                                                                           | -0.748 | 0.006 |
| PD1628 | -            | Uncharacterized protein                                                                           | -0.752 | 0.016 |
| PD0759 | <i>sucB</i>  | Dihydrolipoyllysine-residue succinyltransferase component of 2-oxoglutarate dehydrogenase complex | -0.759 | 0.005 |
| PD1998 | <i>rpsG</i>  | 30S ribosomal protein S7                                                                          | -0.76  | 0.004 |
| PD0398 | <i>carA</i>  | Carbamoyl-phosphate synthase small chain (EC 6.3.5.5)                                             | -0.76  | 0.009 |
| PD0351 | <i>sdhD</i>  | Succinate dehydrogenase hydrophobic membrane anchor subunit                                       | -0.762 | 0.001 |
| PD0065 | -            | GTPase HflX (GTP-binding protein HflX)                                                            | -0.762 | 0.004 |
| PD0310 | -            | Pathogenicity-related protein                                                                     | -0.764 | 0.007 |
| PD1116 | -            | Phage-related protein                                                                             | -0.765 | 0.014 |
| PD0557 | <i>mreB</i>  | Rod shape-determining protein                                                                     | -0.769 | 0.001 |
| PD0650 | <i>purL</i>  | Phosphoribosylformylglycinamide synthase (FGAM synthase)                                          | -0.77  | 0.004 |
| PD1513 | <i>xseB</i>  | Exodeoxyribonuclease 7 small subunit (EC 3.1.11.6)                                                | -0.77  | 0.036 |
| PD1457 | <i>cmk</i>   | Cytidylate kinase (CK) (EC 2.7.4.25) (Cytidine monophosphate kinase) (CMP kinase)                 | -0.774 | 0.013 |
| PD1657 | <i>ttg2D</i> | Toluene tolerance protein                                                                         | -0.775 | 0.001 |
| PD0542 | <i>kdsA</i>  | 2-dehydro-3-deoxyphosphooctonate aldolase (EC 2.5.1.55)                                           | -0.775 | 0.003 |
| PD1456 | <i>rpsA</i>  | 30S ribosomal protein S1                                                                          | -0.776 | 0.003 |
| PD1621 | -            | Uncharacterized protein                                                                           | -0.778 | 0.008 |
| PD1287 | <i>lepA</i>  | Elongation factor 4 (EF-4) (EC 3.6.5.n1) (Ribosomal back-translocase LepA)                        | -0.779 | 0.010 |
| PD0833 | <i>mod</i>   | Methyltransferase, type III restriction-modification system                                       | -0.78  | 0.003 |

|        |             |                                                                                         |        |       |
|--------|-------------|-----------------------------------------------------------------------------------------|--------|-------|
| PD0768 | -           | Phage-related protein                                                                   | -0.783 | 0.037 |
| PD0088 | <i>dapE</i> | Succinyl-diaminopimelate desuccinylase (SDAP desuccinylase)                             | -0.784 | 0.022 |
| PD1658 | -           | Uncharacterized protein                                                                 | -0.785 | 0.001 |
| PD1443 | <i>rplU</i> | 50S ribosomal protein L21                                                               | -0.786 | 0.001 |
| PD2033 | -           | UPF0056 inner membrane protein                                                          | -0.786 | 0.009 |
| PD0530 | <i>lipA</i> | Lipoyl synthase (EC 2.8.1.8) (Lip-syn) (LS) (Lipoate synthase)                          | -0.788 | 0.003 |
| PD0436 | <i>rpsJ</i> | 30S ribosomal protein S10                                                               | -0.788 | 0.009 |
| PD0698 | <i>dapF</i> | Diaminopimelate epimerase (DAP epimerase) (EC 5.1.1.7)                                  | -0.79  | 0.026 |
| PD1297 | -           | Putative manganese efflux pump MntP                                                     | -0.79  | 0.026 |
| PD0175 | <i>prsX</i> | Transcriptional regulator MarR family                                                   | -0.792 | 0.022 |
| PD0402 | <i>recJ</i> | Single-stranded DNA exonuclease                                                         | -0.793 | 0.004 |
| PD1572 | <i>fabA</i> | 3-hydroxydecanoyl-[acyl-carrier-protein] dehydratase (EC 4.2.1.59)                      | -0.797 | 0.004 |
| PD0705 | <i>pepN</i> | Aminopeptidase N                                                                        | -0.797 | 0.005 |
| PD0164 | <i>accA</i> | Acetyl-coenzyme A carboxylase carboxyl transferase subunit alpha (ACCase subunit alpha) | -0.801 | 0.022 |
| PD0686 | <i>glmM</i> | Phosphoglucosamine mutase (EC 5.4.2.10)                                                 | -0.804 | 0.015 |
| PD1865 | <i>murC</i> | UDP-N-acetylmuramate--L-alanine ligase (EC 6.3.2.8)                                     | -0.804 | 0.021 |
| PD1586 | -           | UPF0102 protein PD_1586                                                                 | -0.805 | 0.012 |
| PD1226 | <i>ppa</i>  | Inorganic pyrophosphatase (EC 3.6.1.1) (Pyrophosphate phospho-hydrolase) (PPase)        | -0.811 | 0.004 |
| PD0746 | <i>ahpF</i> | Subunit F of alkyl hydroperoxide reductase                                              | -0.819 | 0.005 |
| PD0300 | -           | Uncharacterized protein                                                                 | -0.824 | 0.012 |
| PD0465 | <i>lip</i>  | Triacylglycerol lipase                                                                  | -0.833 | 0.007 |
| PD0760 | <i>sucA</i> | Oxoglutarate dehydrogenase                                                              | -0.84  | 0.003 |
| PD0313 | <i>pspB</i> | Serine protease                                                                         | -0.841 | 0.006 |
| PD0494 | <i>typA</i> | GTP-binding elongation factor protein                                                   | -0.852 | 0.006 |
| PD0142 | <i>prfC</i> | Peptide chain release factor 3 (RF-3)                                                   | -0.855 | 0.002 |
| PD1317 | -           | Uncharacterized protein                                                                 | -0.857 | 0.032 |
| PD0763 | <i>fumC</i> | Fumarate hydratase class II (Fumarase C) (EC 4.2.1.2)                                   | -0.859 | 0.001 |
| PD0629 | <i>gloA</i> | Lactoylglutathione lyase (EC 4.4.1.5) (Glyoxalase I)                                    | -0.863 | 0.006 |
| PD0218 | <i>pspB</i> | Serine protease                                                                         | -0.865 | 0.002 |
| PD0207 | <i>etfB</i> | Electron transfer flavoprotein beta subunit                                             | -0.865 | 0.010 |
| PD1440 | <i>rpsT</i> | 30S ribosomal protein S20                                                               | -0.868 | 0.006 |
| PD1807 | <i>ompW</i> | Outer membrane protein                                                                  | -0.877 | 0.010 |
| PD0757 | <i>pcp</i>  | Peptidoglycan-associated outer membrane lipoprotein                                     | -0.878 | 0.007 |
| PD1579 | <i>tatB</i> | Sec-independent protein translocase protein TatB                                        | -0.879 | 0.007 |
| PD0458 | <i>rpsM</i> | 30S ribosomal protein S13                                                               | -0.88  | 0.014 |
| PD0448 | <i>rplX</i> | 50S ribosomal protein L24                                                               | -0.881 | 0.007 |
| PD1088 | <i>D</i>    | Phage-related tail protein                                                              | -0.883 | 0.005 |
| PD1636 | -           | Uncharacterized protein                                                                 | -0.887 | 0.001 |
| PD1549 | <i>uptF</i> | UptF protein                                                                            | -0.893 | 0.003 |

|        |              |                                                                               |        |       |
|--------|--------------|-------------------------------------------------------------------------------|--------|-------|
| PD1582 | <i>guaA</i>  | Glutamine amidotransferase                                                    | -0.896 | 0.018 |
| PD0563 | <i>relA</i>  | ATP:GTP 3'-pyrophosphotranferase                                              | -0.897 | 0.001 |
| PD1922 | <i>pilD</i>  | Type 4 prepilin-like proteins leader peptide-processing enzyme (EC 3.4.23.43) | -0.901 | 0.000 |
| PD1971 | -            | Putative beta-barrel assembly-enhancing protease (EC 3.4.-.-)                 | -0.907 | 0.002 |
| PD1031 | -            | Uncharacterized protein                                                       | -0.91  | 0.016 |
| PD1791 | -            | Uncharacterized protein                                                       | -0.911 | 0.002 |
| PD0613 | <i>trpA</i>  | Tryptophan synthase alpha chain (EC 4.2.1.20)                                 | -0.913 | 0.000 |
| PD1914 | <i>rpmI</i>  | 50S ribosomal protein L35                                                     | -0.913 | 0.024 |
| PD1157 | <i>pbp</i>   | Beta-lactamase-like protein                                                   | -0.915 | 0.000 |
| PD1301 | -            | Oligopeptide transporter                                                      | -0.921 | 0.000 |
| PD1720 | -            | Uncharacterized protein                                                       | -0.923 | 0.002 |
| PD0376 | -            | Uncharacterized protein                                                       | -0.925 | 0.009 |
| PD0365 | <i>I</i>     | Phage-related tail protein                                                    | -0.926 | 0.002 |
| PD0612 | <i>trpB</i>  | Tryptophan synthase beta chain (EC 4.2.1.20)                                  | -0.927 | 0.000 |
| PD0221 | <i>pfkA</i>  | Pyrophosphate--fructose 6-phosphate 1-phosphotransferase (EC 2.7.1.90)        | -0.927 | 0.002 |
| PD0447 | <i>rplN</i>  | 50S ribosomal protein L14                                                     | -0.928 | 0.002 |
| PD0289 | -            | Uncharacterized protein                                                       | -0.932 | 0.023 |
| PD0277 | -            | Ferredoxin                                                                    | -0.936 | 0.012 |
| PD1346 | -            | Uncharacterized protein                                                       | -0.937 | 0.001 |
| PD0215 | <i>cvaC</i>  | Colicin V                                                                     | -0.941 | 0.019 |
| PD0379 | <i>dpoL</i>  | Phage-related DNA polymerase                                                  | -0.941 | 0.027 |
| PD2092 | -            | Uncharacterized protein                                                       | -0.949 | 0.048 |
| PD1671 | -            | Two-component, response regulator                                             | -0.952 | 0.002 |
| PD1013 | -            | Uncharacterized protein                                                       | -0.952 | 0.012 |
| PD1967 | <i>ppx</i>   | Exopolyphosphatase                                                            | -0.957 | 0.002 |
| PD1789 | -            | Uncharacterized protein                                                       | -0.958 | 0.001 |
| PD0772 | -            | Phage-related protein                                                         | -0.963 | 0.020 |
| PD0368 | <i>higA</i>  | Proteic killer suppression protein                                            | -0.966 | 0.002 |
| PD1620 | -            | Outer membrane protein assembly factor BamB                                   | -0.968 | 0.000 |
| PD0008 | -            | Uncharacterized protein                                                       | -0.968 | 0.001 |
| PD0864 | <i>xthA</i>  | Exodeoxyribonuclease III                                                      | -0.982 | 0.000 |
| PD1597 | -            | Uncharacterized protein                                                       | -0.986 | 0.014 |
| PD1655 | <i>ttg2B</i> | Toluene tolerance protein                                                     | -0.988 | 0.000 |
| PD1592 | -            | Uncharacterized protein                                                       | -0.991 | 0.043 |
| PD0350 | -            | Succinate dehydrogenase membrane anchor subunit                               | -0.996 | 0.002 |
| PD1743 | <i>nusB</i>  | N utilization substance protein B homolog (Protein NusB)                      | -1.003 | 0.001 |
| PD2002 | <i>rplL</i>  | 50S ribosomal protein L7/L12                                                  | -1.004 | 0.001 |
| PD1284 | <i>algU</i>  | RNA polymerase sigma-H factor                                                 | -1.006 | 0.000 |
| PD1599 | -            | Phage-related protein                                                         | -1.018 | 0.010 |
| PD0747 | <i>oxyR</i>  | Oxidative stress transcriptional regulator                                    | -1.025 | 0.000 |
| PD0084 | <i>rplS</i>  | 50S ribosomal protein L19                                                     | -1.035 | 0.003 |
| PD1709 | <i>mopB</i>  | Outer membrane protein                                                        | -1.042 | 0.000 |
| PD0312 | -            | Uncharacterized protein                                                       | -1.046 | 0.001 |

|        |             |                                                                        |        |       |
|--------|-------------|------------------------------------------------------------------------|--------|-------|
| PD0127 | -           | Uncharacterized protein                                                | -1.054 | 0.000 |
| PD0507 | -           | Pathogenicity protein                                                  | -1.058 | 0.000 |
| PD0141 | <i>fabG</i> | 3-oxoacyl-[ACP] reductase                                              | -1.058 | 0.001 |
| PD1581 | -           | Uncharacterized protein                                                | -1.061 | 0.000 |
| PD0195 | <i>rbfA</i> | Ribosome-binding factor A                                              | -1.065 | 0.000 |
| PD1510 | -           | Uncharacterized protein                                                | -1.066 | 0.035 |
| PD1945 | <i>rpsF</i> | 30S ribosomal protein S6                                               | -1.069 | 0.002 |
| PD0503 | -           | Uncharacterized protein                                                | -1.083 | 0.000 |
| PD1411 | <i>aspC</i> | Aminotransferase                                                       | -1.1   | 0.000 |
| PD0497 | -           | Uncharacterized protein                                                | -1.107 | 0.002 |
| PD2108 | -           | Uncharacterized protein                                                | -1.112 | 0.003 |
| PD1547 | -           | Uncharacterized protein                                                | -1.113 | 0.000 |
| PD1700 | -           | Uncharacterized protein                                                | -1.133 | 0.022 |
| PD2085 | -           | Uncharacterized protein                                                | -1.138 | 0.020 |
| PD2018 | <i>ipk</i>  | 4-diphosphocytidyl-2-C-methyl-D-erythritol kinase (CMK)                | -1.17  | 0.000 |
| PD0743 | -           | Uncharacterized protein                                                | -1.172 | 0.016 |
| PD2003 | <i>rplJ</i> | 50S ribosomal protein L10                                              | -1.175 | 0.001 |
| PD0400 | <i>greA</i> | Transcription elongation factor GreA (Transcript cleavage factor GreA) | -1.185 | 0.001 |
| PD2025 | -           | Uncharacterized protein                                                | -1.196 | 0.006 |
| PD0488 | <i>rpmB</i> | 50S ribosomal protein L28                                              | -1.197 | 0.001 |
| PD1111 | -           | Uncharacterized protein                                                | -1.2   | 0.001 |
| PD1993 | -           | Temperature acclimation protein B                                      | -1.201 | 0.001 |
| PD0811 | <i>fis</i>  | Putative Fis-like DNA-binding protein                                  | -1.215 | 0.002 |
| PD0546 | <i>ispF</i> | 2-C-methyl-D-erythritol 2,4-cyclodiphosphate synthase (MECDP-synthase) | -1.216 | 0.005 |
| PD1710 | <i>dsbB</i> | Disulfide bond formation protein B (Disulfide oxidoreductase)          | -1.228 | 0.000 |
| PD1094 | <i>Fl</i>   | Phage-related contractile tail sheath protein                          | -1.237 | 0.000 |
| PD0824 | <i>hsf</i>  | Surface protein                                                        | -1.272 | 0.000 |
| PD0003 | <i>recF</i> | DNA replication and repair protein RecF                                | -1.272 | 0.000 |
| PD2122 | <i>rnpA</i> | Ribonuclease P protein component (RNase P protein)                     | -1.279 | 0.001 |
| PD1345 | -           | Uncharacterized protein PD_1345                                        | -1.279 | 0.001 |
| PD0791 | -           | Uncharacterized protein                                                | -1.284 | 0.001 |
| PD1050 | -           | Uncharacterized protein                                                | -1.305 | 0.001 |
| PD1285 | -           | Uncharacterized protein                                                | -1.32  | 0.000 |
| PD0528 | -           | Uncharacterized protein                                                | -1.323 | 0.000 |
| PD1442 | <i>rpmA</i> | 50S ribosomal protein L27                                              | -1.335 | 0.000 |
| PD1752 | <i>yojH</i> | Probable malate:quinone oxidoreductase (EC 1.1.5.4)                    | -1.345 | 0.001 |
| PD1112 | -           | Uncharacterized protein                                                | -1.354 | 0.003 |
| PD0666 | <i>infA</i> | Translation initiation factor IF-1                                     | -1.357 | 0.000 |
| PD0244 | -           | Uncharacterized protein                                                | -1.381 | 0.022 |
| PD0489 | <i>rpmG</i> | 50S ribosomal protein L33                                              | -1.386 | 0.000 |
| PD0577 | <i>dcm</i>  | Site-specific DNA-methyltransferase                                    | -1.39  | 0.000 |
| PD1960 | <i>rpsB</i> | 30S ribosomal protein S2                                               | -1.447 | 0.000 |
| PD0657 | -           | Uncharacterized protein                                                | -1.453 | 0.006 |

|        |             |                           |        |       |
|--------|-------------|---------------------------|--------|-------|
| PD2005 | <i>rplK</i> | 50S ribosomal protein L11 | -1.474 | 0.000 |
| PD2117 | -           | Uncharacterized protein   | -1.505 | 0.000 |
| PD1732 | -           | Frame shift               | -1.517 | 0.000 |
| PD0498 | -           | Uncharacterized protein   | -1.543 | 0.000 |
| PD0217 | -           | Uncharacterized protein   | -1.637 | 0.000 |
| PD0918 | -           | Phage-related protein     | -1.671 | 0.000 |
| PD0298 | -           | Uncharacterized protein   | -1.681 | 0.000 |
| PD1113 | -           | Lysozyme (EC 3.2.1.17)    | -1.74  | 0.000 |
| PD0299 | -           | Uncharacterized protein   | -1.743 | 0.011 |
| PD1507 | -           | Uncharacterized protein   | -1.781 | 0.000 |
| PD1130 | -           | Uncharacterized protein   | -1.869 | 0.000 |
| PD0243 | -           | Uncharacterized protein   | -1.89  | 0.001 |
| PD0556 | -           | Uncharacterized protein   | -1.929 | 0.000 |
| PD1723 | -           | Uncharacterized protein   | -1.97  | 0.000 |
| PD1786 | -           | Uncharacterized protein   | -2.226 | 0.001 |
| PD0216 | -           | Colicin V                 | -3.079 | 0.000 |
| PD1790 | -           | Uncharacterized protein   | -3.116 | 0.000 |
| PD1121 | -           | Uncharacterized protein   | -3.432 | 0.000 |
| PD1245 | -           | Uncharacterized protein   | -4.826 | 0.000 |
| PD0921 | -           | Uncharacterized protein   | -4.955 | 0.000 |
| PD0919 | -           | Uncharacterized protein   | -5.022 | 0.000 |
| PD0920 | -           | Uncharacterized protein   | -5.087 | 0.000 |

**Table S2.** Differentially expressed secreted proteins in the *prtA* mutant.

| Description                               | Gene name | FC ( <i>prtA</i> /WT) | p-value |
|-------------------------------------------|-----------|-----------------------|---------|
| Argininosuccinate synthase argG           | argG      | 3.007                 | 0.006   |
| Polyphosphate-selective porin             | oprO      | 2.62                  | 0.000   |
| 30S ribosomal protein S5                  | rpsE      | 2.296                 | 0.028   |
| Uncharacterized protein                   | PD0955    | 1.976                 | 0.033   |
| Fimbrial protein                          | pilA      | 1.974                 | 0.018   |
| 50S ribosomal protein                     | rplJ      | 1.955                 | 0.035   |
| Outer membrane protein XadA               | xadA      | 1.871                 | 0.000   |
| Uncharacterized protein                   | PD1684    | 1.82                  | 0.012   |
| 50S ribosomal protein L3                  | rplC      | 1.792                 | 0.036   |
| 50S ribosomal protein L11                 | rplK      | 1.738                 | 0.037   |
| DNA-directed RNA polymerase subunit alpha | rpoA      | 1.693                 | 0.045   |
| 50S ribosomal protein L1                  | rplA      | 1.683                 | 0.033   |
| DNA-directed RNA polymerase subunit beta' | rpoC      | 1.676                 | 0.017   |
| Transcription termination factor Rho      | rho       | 1.597                 | 0.033   |
| Rod shape-determining protein             | mreB      | 1.58                  | 0.028   |
| Ketol-acid reductoisomerase               | ilvC      | 1.579                 | 0.014   |
| GTP-binding elongation factor protein     | typA      | 1.569                 | 0.037   |

|                                                                    |        |       |       |
|--------------------------------------------------------------------|--------|-------|-------|
| ATP synthase subunit alpha                                         | atpA   | 1.549 | 0.037 |
| ATP synthase subunit b                                             | atpF   | 1.547 | 0.015 |
| 50S ribosomal protein L30                                          | rpmD   | 1.448 | 0.039 |
| ATP-dependent RNA helicase DeaD                                    | deaD   | 1.42  | 0.029 |
| DNA-directed RNA polymerase subunit beta                           | rpoB   | 1.37  | 0.042 |
| Succinate dehydrogenase flavoprotein subunit                       | sdhA   | 1.308 | 0.037 |
| Transcription termination/antitermination protein NusA             | nusA   | 1.303 | 0.035 |
| Bacteriocin                                                        | frpC   | 0.757 | 0.037 |
| 60 kDa chaperonin                                                  | groL   | 0.754 | 0.021 |
| Metallopeptidase                                                   | PD1570 | 0.751 | 0.037 |
| 6-phosphogluconate dehydratase                                     | edd    | 0.721 | 0.015 |
| Glycine dehydrogenase (decarboxylating)                            | gcvP   | 0.713 | 0.027 |
| Serine protease pspB                                               | pspB   | 0.71  | 0.036 |
| Polyribonucleotide nucleotidyltransferase                          | pnp    | 0.707 | 0.005 |
| OmpA family protein                                                | ompA   | 0.696 | 0.000 |
| Oxidoreductase                                                     | PD2039 | 0.696 | 0.037 |
| 10 kDa chaperonin                                                  | groS   | 0.691 | 0.029 |
| N-acetylornithine carbamoyltransferase                             | argF'  | 0.686 | 0.029 |
| Phosphoglucomutase                                                 | xanA   | 0.675 | 0.000 |
| D-3-phosphoglycerate dehydrogenase                                 | serA   | 0.665 | 0.008 |
| Periplasmic protease                                               | mucD   | 0.663 | 0.017 |
| Chaperone protein ClpB                                             | clpB   | 0.662 | 0.010 |
| RNA polymerase-binding transcription factor DksA                   | dksA   | 0.658 | 0.007 |
| Isocitrate dehydrogenase                                           | icd    | 0.657 | 0.001 |
| Bifunctional purine biosynthesis protein PurH                      | purH   | 0.654 | 0.005 |
| Chaperone protein                                                  | PD0061 | 0.651 | 0.049 |
| Outer membrane protein P6                                          | PD0895 | 0.647 | 0.027 |
| Uncharacterized protein                                            | PD0121 | 0.638 | 0.003 |
| Thiol:disulfide interchange protein                                | dsbA   | 0.634 | 0.023 |
| Isocitrate/isopropylmalate dehydrogenase                           | icdA   | 0.633 | 0.001 |
| Oligopeptidase A                                                   | prlC   | 0.63  | 0.001 |
| Subunit C of alkyl hydroperoxide reductase                         | ahpC   | 0.63  | 0.003 |
| ABC transporter sulfate binding protein                            | sbp    | 0.625 | 0.008 |
| Inorganic pyrophosphatase                                          | ppa    | 0.625 | 0.006 |
| Uncharacterized protein                                            | PD0896 | 0.624 | 0.020 |
| Citrate synthase                                                   | gltA   | 0.623 | 0.039 |
| Valine--tRNA ligase                                                | valS   | 0.615 | 0.001 |
| 3-hydroxydecanoyl-[acyl-carrier-protein] dehydratase               | fabA   | 0.614 | 0.037 |
| 2,3,4,5-tetrahydropyridine-2,6-dicarboxylate N-succinyltransferase | dapD   | 0.611 | 0.000 |
| Dihydroorotase                                                     | pyrC   | 0.611 | 0.005 |
| Probable cytosol aminopeptidase                                    | pepA   | 0.608 | 0.000 |
| Ribosome-recycling factor                                          | frr    | 0.602 | 0.014 |
| Uncharacterized protein                                            | PD0904 | 0.593 | 0.000 |
| Uncharacterized protein                                            | PD1556 | 0.589 | 0.040 |
| Glyceraldehyde-3-phosphate dehydrogenase                           | gapA   | 0.588 | 0.001 |
| 50S ribosomal protein L9                                           | rplI   | 0.584 | 0.000 |

|                                                |        |       |       |
|------------------------------------------------|--------|-------|-------|
| Asparagine--tRNA ligase                        | asnS   | 0.584 | 0.005 |
| Zinc protease                                  | PD1853 | 0.581 | 0.000 |
| S-adenosylmethionine synthase                  | metK   | 0.574 | 0.003 |
| Aconitase                                      | rpfA   | 0.561 | 0.000 |
| Peptidase (M20/M25/M40 family)                 | PD1850 | 0.561 | 0.000 |
| Phosphoserine aminotransferase                 | serC   | 0.561 | 0.037 |
| Alanyl dipeptidyl peptidase                    | PD1300 | 0.557 | 0.000 |
| Peptidyl-dipeptidase                           | dcp    | 0.551 | 0.000 |
| Dipeptidyl aminopeptidase                      | ptrB   | 0.546 | 0.000 |
| Peptidyl-prolyl cis-trans isomerase            | PD1168 | 0.544 | 0.000 |
| Thioredoxin                                    | yneN   | 0.544 | 0.024 |
| Toluene tolerance protein                      | ttg2D  | 0.544 | 0.000 |
| Chaperone protein HtpG                         | htpG   | 0.542 | 0.000 |
| Malate dehydrogenase                           | mdh    | 0.51  | 0.000 |
| Electron transfer flavoprotein alpha subunit   | etfA   | 0.505 | 0.000 |
| Uncharacterized protein                        | PD0657 | 0.502 | 0.001 |
| Cysteine synthase                              | cysK   | 0.498 | 0.019 |
| Organic hydroperoxide resistance protein       | ohr    | 0.474 | 0.000 |
| Superoxide dismutase                           | sodA   | 0.468 | 0.000 |
| 2-dehydro-3-deoxyphosphooctonate aldolase      | kdsA   | 0.46  | 0.015 |
| Chaperone SurA                                 | surA   | 0.452 | 0.000 |
| Uncharacterized protein                        | PD1786 | 0.436 | 0.000 |
| Probable S-methyl-5'-thioinosine phosphorylase | mtnP   | 0.422 | 0.004 |
| Uncharacterized protein                        | PD0090 | 0.403 | 0.039 |
| Chaperone protein DnaK                         | dnaK   | 0.401 | 0.000 |
| Uncharacterized protein                        | PD0858 | 0.397 | 0.000 |
| Uncharacterized protein                        | PD1028 | 0.389 | 0.000 |
| Superoxide dismutase                           | sodM   | 0.375 | 0.002 |
| Uncharacterized protein                        | PD0956 | 0.347 | 0.000 |

---

**Table S3.** Enrichment analysis of gene ontology terms from differentially expressed transcripts in the *prtA* mutant.

| <b><i>Up-regulated</i></b>   |                                                          |          |           |                |
|------------------------------|----------------------------------------------------------|----------|-----------|----------------|
| <b>ID</b>                    | <b>Description</b>                                       | <b>P</b> | <b>G*</b> | <b>G90% CI</b> |
| GO:0003677                   | DNA binding                                              | 0        | 0.39      | [0.32;0.47]    |
| GO:0008235                   | metalloexopeptidase activity                             | 0        | 0.84      | [0.84;0.84]    |
| GO:0006561                   | proline biosynthesis                                     | 0.01     | 0.84      | [0.84;0.84]    |
| GO:0009245                   | lipid A biosynthesis                                     | 0.01     | 0.55      | [0.55;0.55]    |
| GO:0006760                   | folic acid and derivative metabolism                     | 0.01     | 0.89      | [0.89;0.89]    |
| GO:0030163                   | protein catabolism                                       | 0.01     | 1.00      | [1.00;1.00]    |
| GO:0045449                   | regulation of transcription                              | 0.02     | 0.59      | [0.44;0.73]    |
| GO:0006865                   | amino acid transport                                     | 0.03     | 0.70      | [0.70;0.70]    |
| GO:0009432                   | SOS response                                             | 0.03     | 0.48      | [0.49;0.49]    |
| GO:0045892                   | negative regulation of transcription                     | 0.03     | 0.84      | [0.84;0.84]    |
| GO:0004239                   | methionyl aminopeptidase activity                        | 0.03     | 1.00      | [1.00;1.00]    |
| GO:0006974                   | response to DNA damage stimulus                          | 0.04     | 0.35      | [0.27;0.48]    |
| GO:0015995                   | porphyrin biosynthesis                                   | 0.04     | 0.59      | [0.59;0.59]    |
| GO:0042626                   | ATPase activity, coupled to transmembrane movement       | 0.04     | 0.62      | [0.63;0.63]    |
| GO:0015628                   | type II protein secretion system                         | 0.04     | 0.62      | [0.48;0.76]    |
| GO:0009405                   | pathogenesis                                             | 0.04     | 0.59      | [0.59;0.59]    |
| GO:0000155                   | two-component sensor molecule activity                   | 0.05     | 0.45      | [0.45;0.45]    |
| <b><i>Down-regulated</i></b> |                                                          |          |           |                |
| <b>ID</b>                    | <b>Description</b>                                       | <b>P</b> | <b>G*</b> | <b>G90% CI</b> |
| GO:0003723                   | RNA binding                                              | 0        | 0.43      | [0.40;0.46]    |
| GO:0006412                   | protein biosynthesis                                     | 0        | 0.58      | [0.56;0.61]    |
| GO:0003735                   | structural constituent of ribosome                       | 0        | 0.67      | [0.67;0.67]    |
| GO:0005840                   | ribosome                                                 | 0        | 0.67      | [0.67;0.67]    |
| GO:0030529                   | ribonucleoprotein complex                                | 0        | 0.65      | [0.65;0.65]    |
| GO:0019843                   | rRNA binding                                             | 0        | 0.61      | [0.61;0.61]    |
| GO:0006099                   | tricarboxylic acid cycle                                 | 0        | 0.68      | [0.68;0.68]    |
| GO:0006541                   | glutamine metabolism                                     | 0        | 0.67      | [0.67;0.67]    |
| GO:0004088                   | carbamoyl-phosphate synthase activity                    | 0        | 1.00      | [1.00;1.00]    |
| GO:0015935                   | small ribosomal subunit                                  | 0.01     | 0.71      | [0.71;0.71]    |
| GO:0009165                   | nucleotide biosynthesis                                  | 0.01     | 0.71      | [0.71;0.71]    |
| GO:0009089                   | lysine biosynthesis via diaminopimelate                  | 0.01     | 0.80      | [0.80;0.80]    |
| GO:0003989                   | acetyl-CoA carboxylase activity                          | 0.01     | 0.84      | [0.84;0.84]    |
| GO:0006353                   | transcription termination                                | 0.02     | 0.84      | [0.84;0.84]    |
| GO:0015450                   | protein translocase activity                             | 0.02     | 0.71      | [0.71;0.71]    |
| GO:0016874                   | ligase activity                                          | 0.02     | 0.28      | [0.23;0.37]    |
| GO:0004289                   | subtilase activity                                       | 0.02     | 0.84      | [0.84;0.84]    |
| GO:0004834                   | tryptophan synthase activity                             | 0.02     | 1.00      | [1.00;1.00]    |
| GO:0006098                   | pentose-phosphate shunt                                  | 0.02     | 1.00      | [1.00;1.00]    |
| GO:0000049                   | tRNA binding                                             | 0.03     | 0.65      | [0.65;0.65]    |
| GO:0042254                   | ribosome biogenesis and assembly                         | 0.03     | 1.00      | [1.00;1.00]    |
| GO:0016868                   | intramolecular transferase activity, phosphotransferases | 0.03     | 0.71      | [0.71;0.71]    |
| GO:0009317                   | acetyl-CoA carboxylase complex                           | 0.03     | 0.84      | [0.84;0.84]    |
| GO:0006568                   | tryptophan metabolism                                    | 0.03     | 0.71      | [0.71;0.71]    |
| GO:0004086                   | carbamoyl-phosphate synthase activity                    | 0.03     | 1.00      | [1.00;1.00]    |



|            |                                                              |      |      |             |
|------------|--------------------------------------------------------------|------|------|-------------|
| GO:0016829 | lyase activity                                               | 0.04 | 0.28 | [0.24;0.33] |
| GO:0016114 | terpenoid biosynthesis                                       | 0.04 | 0.63 | [0.63;0.63] |
| GO:0009306 | protein secretion                                            | 0.04 | 0.60 | [0.55;0.66] |
| GO:0016616 | oxidoreductase activity, acting on the CH-OH group of donors | 0.04 | 0.71 | [0.59;0.80] |
| GO:0000104 | succinate dehydrogenase activity                             | 0.04 | 1.00 | [1.00;1.00] |
| GO:0009231 | riboflavin biosynthesis                                      | 0.05 | 0.80 | [0.71;0.85] |
| GO:0006096 | glycolysis                                                   | 0.05 | 0.46 | [0.46;0.46] |

\* G is the gamma measure of statistical association and G90% is its 90% credibility interval ("error-bar").

### **Complete method for Western blot with anti-PrtA**

To detect PrtA in *X. fastidiosa*, a polyclonal antibody was generated in rabbit by injecting synthetic peptides corresponding to structural epitopes (GenScript, NJ). Anti-PrtA was diluted in PBS-M 1% (PBS plus 1% non-fat dried milk) at a dilution of 1:500. Polyclonal anti-PrtA was HRP-conjugated. Blocking and washing used PBS-M 5% (PBS plus 5% non-fat dried milk) and PBS-T 0.1% (PBS plus 0.1% Tween 20), respectively, and the blot was developed using ECL Plus Reagents (GE Life Sciences, USA). The blot was visualized using a ChemiDoc-It TS2 (BioRad, CA) imaging instrument.

### **Complete method for protein extraction and proteomic data analysis**

Six culture replicates were grown in PD3 media for seven days (120 rpm at 28°C) and cells were separated by centrifugation at 20,000 g. The supernatant was concentrated using Amicon Ultra 15-Centrifugal Filter units (Millipore, Ma) with a three kDa membrane. Total protein was extracted from the resulting fraction using a ProteoExtract Protein Precipitation Kit (Millipore, MA). The resulting protein pellet was solubilized in 400 µL 50 mM triethyl ammonium bicarbonate (TEAB) and 100 µL was taken for tryptic digestion. 500 mM tris(2-carboxyethyl)-phosphine (TCEP) (Pierce, Rockford, IL) was added to a final

concentration of 10 mM and samples were incubated 10 min at 90°C to reduce disulfide bonds. Next, 110 mM iodoacetamide (IAA) was added to a final concentration of 15 mM and incubated one hour at room temperature, followed by the addition of 20 µL DTT to quench the IAA reaction. A 1:25 (enzyme:protein) ratio of trypsin (Promega) was added to 100 µg of the protein sample and incubated at 37°C overnight. Subsequently, samples were desalted using C18 Macro Spin columns (Nest Group) and dried by vacuum centrifugation. The desalted and lyophilized samples were resuspended in 50 mM TEAB and ~30 µg of tryptic-digested peptides were taken for TMT labeling. TMT labeling was performed on each aliquot with reporter ions  $m/z = 126.1, 127.1, 128.1, \text{ and } 129.1$  in 41 µL ethanol and aliquots were incubated 60 min at room temperature. Eight µL hydroxylamine 5% (v:v) was added to quench the reaction and samples were vacuum-centrifuged prior to desalting using C18 Macro Spin columns (Nest Group, MA). Samples were vacuum-centrifuged once more prior to strong cation exchange (SCX) fractionation.

Strong cation exchange (SCX) was carried out using the SCX SpinTips Sample Prep Kit (ProteaBio, WV). Each aliquot was resuspended in 50 µL of designated buffer and ~10 µg of each sample was pooled prior to SCX fractionation. Samples were fractionated by stepwise addition of 20, 40, 60, 80, 100, 150, 250, and 500 mM ammonium formate in 10% acetonitrile. All eight fractions, including the initial binding flow through, were vacuum-centrifuged to remove any acetonitrile and then desalted using C18 Macro Spin columns (Nest Group, MA). LC separation was carried out on a Waters Nano Acquity UHPLC (Waters Corporation, MA) with a Proxeon nanospray source. Each SCX fraction (nine total) was reconstituted in 2% acetonitrile/ 0.1% trifluoroacetic acid and 1 µg loaded onto a 100 micron x 25 mm Magic C18 100Å 5U reverse phase trap, where they were desalted online before separation on a 75 micron x 150 mm Magic C18 200Å 3U reverse phase column.

Peptides were eluted using a gradient of 0.1% formic acid (A) and 100% acetonitrile (B) with a flow rate of 300 nL/min. A 60 min gradient was run with 5% to 35% B over 50 min, 35% to 80% B over three min, 80% B for one min, 80% to 5% B over one min, and finally held at 5% B for five min.

Mass spectra were collected on an Orbitrap Q Exactive Plus mass spectrometer (Thermo Fisher Scientific, CA) in a data-dependent mode with one MS precursor scan followed by 15 MS/MS scans. All MS/MS samples were analyzed using X! Tandem (The GPM, thegpm.org; version X! Tandem Sledgehammer (2013.09.01.1)). X! Tandem was set up to search the Uniprot Glycine max database (64636 entries, March 2014), the *X. fastidiosa* (strain Temecula1/ATCC 700964) database (2008 entries, March 2014), the cRAP database of common laboratory contaminants (<http://www.thegpm.org/crap/>) and an equal number of reverse decoy sequences, assuming the digestion enzyme trypsin. X! Tandem was searched with a fragment ion mass tolerance of 20 ppm and a parent ion tolerance of 20 ppm. TMT6plex of lysine and the N-terminus was specified in X! Tandem as a fixed modification. Glu->pyro-Glu of the N-terminus, ammonia-loss of the N-terminus, gln->pyro-Glu of the N-terminus, deamidated of asparagine and glutamine, oxidation of methionine and tryptophan, dioxidation of methionine and tryptophan, and acetyl of the n-terminus were specified in X! Tandem as variable modifications. Scaffold Q+ (version Scaffold\_4.4.0, Proteome Software Inc., Portland, OR) was used to analyze peptide and protein identifications and obtain TMT reporter ion intensities from the MS/MS spectra. Peptide identifications were accepted if they could be established at a 99.0% probability by the Scaffold Local FDR algorithm, which corresponded to a 0.20% spectra decoy FDR and a 5.0% protein decoy FDR with one identified peptide per protein. Protein probabilities were assigned by the Protein Prophet algorithm<sup>2</sup>. Proteins that contained similar peptides and

that could not be differentiated based on MS/MS analysis alone were grouped to satisfy the principles of parsimony. Proteins sharing significant peptide evidence were grouped into clusters. Acquired intensities in the experiment were globally normalized across all acquisition runs. Individual quantitative samples were normalized within each acquisition run. Intensities for each peptide identified were normalized within the assigned protein. The reference channels were normalized to produce a 1:1 fold change. All normalization calculations were performed using medians to multiplicatively normalize data. Peptide-level intensities were log transformed and normalized using the back-fitting approach as described<sup>3</sup>, with the exception that they were not normalized for label effects since label was confounded with a strain. Tests for differential protein expression were conducted using linear mixed effects models with a fixed effect for strain and random effects for peptide and sample. P-values for the strain effect were FDR-adjusted. Analyses were conducted using the R, version 3.1.0 (<http://www.R-project.org/>). Mixed effects modeling was conducted using the R package nlme, version 3.1-117<sup>4</sup>.

### **Complete method for RNA extraction and RNA-seq library preparation**

Bacterial strains were grown in six replicates for eight days in 50 mL PD3 media at 28°C with 120 rpm constant shaking. After obtaining a pellet by centrifuging at 10,000 g for 1 min, RNA was extracted using the MasterPure Complete DNA and RNA Purification Kit from Epicenter (Madison, WI) following manufacturer's directions. Next, ribosomal RNA was depleted using the Ribo-Zero rRNA Removal Kit for Gram-negative bacteria epicenter (Madison, WI) exactly as described by the manufacturer. Strand-specific RNA-seq libraries were generated by the UC Davis Genome Center DNA Technologies Core Facility from the ribo-depleted RNA samples using an Apollo 324 liquid handler (Wafergen, CA) and PrepX

RNA library preparation kits (Wafergen) following the instructions of the manufacturer. After a cleanup step using 1x volume of Ampure XP beads (Beckman Coulter, CA), the RNA-seq libraries were PCR-amplified using Phusion High-Fidelity polymerase (NEB, MA) following standard procedures, cleaned up again using a 1x volume of Ampure XP beads, and then quantified by fluorometry (Qubit; LifeTechnologies, CA). Libraries were analyzed with a Bioanalyzer 2100 instrument (Agilent, CA) and then pooled in equimolar ratios according to the fluorometric measurements. The pooled library was quantified by qPCR with a Kapa Library Quant kit (Kapa, South Africa) and sequenced on one lane of an Illumina HighSeq 2500 (Illumina, CA).

### **Transcriptome data analysis**

Bioinformatics data analysis was performed by Monica Britton of the UC Davis Genome Center Bioinformatics Core Facility. Read quality and contamination were assessed with FastQC v.0-10.1 (<http://www.bioinformatics.babraham.ac.uk/projects/fastqc/>). Scythe v.0.991 and Sickle v.1.210 (<https://github.com/ucdavis-bioinformatics>) were used for Illumina adapter and quality-based trimming, respectively. Reads trimmed to less than 25 bases were discarded. Genome and annotation data used in this analysis can be found at [ftp://ftp.ncbi.nih.gov/genomes/Bacteria/Xylella\\_fastidiosa\\_Temecula1\\_uid57869/](ftp://ftp.ncbi.nih.gov/genomes/Bacteria/Xylella_fastidiosa_Temecula1_uid57869/). Reads were aligned to the Temecula 1 genome using bowtie2 v.2.1.0<sup>5</sup>. These alignments showed a high level of transcription in a previously unannotated region (genomic coordinates 989100-989300). A reference transcriptome was generated from the NCBI files, using the gffread program within cufflinks v.2.1.1<sup>6</sup>. This transcriptome was augmented with the sequences of rRNA, the highly expressed unannotated region ("Tem1\_989300\_989100\_RC"), and the transgenes (Kan\_R, PrtA\_GentR) used in this

research. BWA's short read aligner v.0.6.27 was then used to align the reads to the augmented transcriptome. Raw counts per gene were generated from the bwa alignments using sam2counts.py (<https://github.com/ucdavis-bioinformatics>). The raw counts were statistically analyzed with edgeR<sup>8</sup> to produce tables of expression values and fold changes and diagnostic plots.

Enrichment of gene ontology terms of differentially expressed transcripts was performed with BayGO<sup>9</sup> using 500 simulations and a P-value cutoff of 0.05.

## References

- 1 Matsumoto, A., Young, G. M. & Igo, M. M. Chromosome-based genetic complementation system for *Xylella fastidiosa*. *Appl Environ Microb* **75**, 1679-1687, doi:10.1128/AEM.00024-09 (2009).
- 2 Nesvizhskii, A. I., Keller, A., Kolker, E. & Aebersold, R. A statistical model for identifying proteins by tandem mass spectrometry. *Analytical chemistry* **75**, 4646-4658 (2003).
- 3 Oberg, A. L. *et al.* Statistical analysis of relative labeled mass spectrometry data from complex samples using ANOVA. *J Proteome Res* **7**, 225-233, doi:Doi 10.1021/Pr700734f (2008).
- 4 Pinheiro J, B. D., DebRoy S, Sarkar D and R Core Team. nlme: Linear and Nonlinear Mixed Effects Models. *R package version 3.1-118* (2014).
- 5 Langmead, B. & Salzberg, S. L. Fast gapped-read alignment with Bowtie 2. *Nature methods* **9**, 357-359, doi:10.1038/nmeth.1923 (2012).
- 6 Roberts, A., Pimentel, H., Trapnell, C. & Pachter, L. Identification of novel transcripts in annotated genomes using RNA-Seq. *Bioinformatics* **27**, 2325-2329, doi:Doi 10.1093/Bioinformatics/Btr355 (2011).
- 7 Li, H. & Durbin, R. Fast and accurate short read alignment with Burrows-Wheeler transform. *Bioinformatics* **25**, 1754-1760, doi:10.1093/bioinformatics/btp324 (2009).
- 8 Robinson, M. D., McCarthy, D. J. & Smyth, G. K. edgeR: a Bioconductor package for differential expression analysis of digital gene expression data. *Bioinformatics* **26**, 139-140, doi:10.1093/bioinformatics/btp616 (2010).
- 9 Vencio, R. Z., Koide, T., Gomes, S. L. & Pereira, C. A. BayGO: Bayesian analysis of ontology term enrichment in microarray data. *BMC Bioinformatics* **7**, 86, doi:10.1186/1471-2105-7-86 (2006).
